# Supplementary material for: One-pot formation of fluorescent γ-lactams having an α-phosphorus ylide moiety through three-component α(δ′)-Michael reactions of phosphines with an enyne and N-tosyl aldimines
Source: Royal Society of Chemistry journal article supplement (doi:10.1039/c3ob41811a), 2013-10-16
Supplement: c3ob41811a.pdf [file c3ob41811a.pdf]

# Supporting Information

## One-Pot Formation of Fluorescent $\gamma$ -Lactams Having an $\alpha$ -Phosphorus Ylide Moiety through Three-Component $\alpha(\delta')$ -Michael Reaction of Phosphines with an Enyne and *N*-Tosyl Aldimines

*Yu-Wei Lin, Jie-Cheng Deng, You-Zung Hsieh and Shih-Ching Chuang\**

*Department of Applied Chemistry, National Chiao Tung University, Hsinchu, Taiwan, R.O.C.  
30010*

**E-mail:** jscchuang@faculty.nctu.edu.tw

| <u>Content</u>                                                                            | <u>Page</u> |
|-------------------------------------------------------------------------------------------|-------------|
| 1. Spectral data ( $^1\text{H}$ and $^{13}\text{C}$ NMR spectra) of compounds <b>4a-p</b> | 2—33        |
| 2. UV-vis absorption spectra of compounds <b>4a-p</b>                                     | 34—35       |

Figure S1.  $^1\text{H}$  NMR spectrum of compound **4a** (600 MHz,  $\text{CDCl}_3$ )

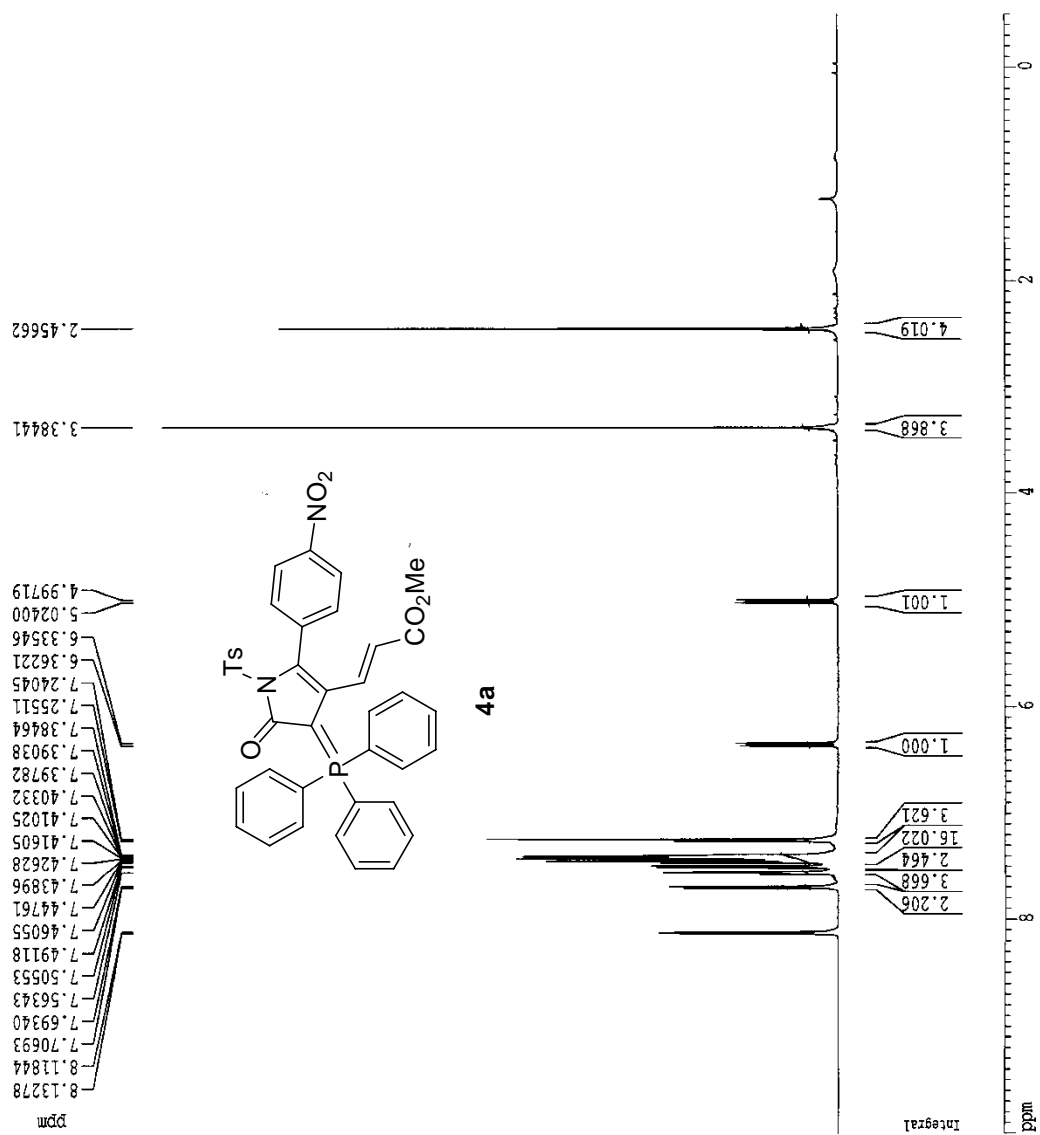

**Figure S2.**  $^{13}\text{C}$  NMR spectrum of compound **4a** (150 MHz,  $\text{CDCl}_3$ )

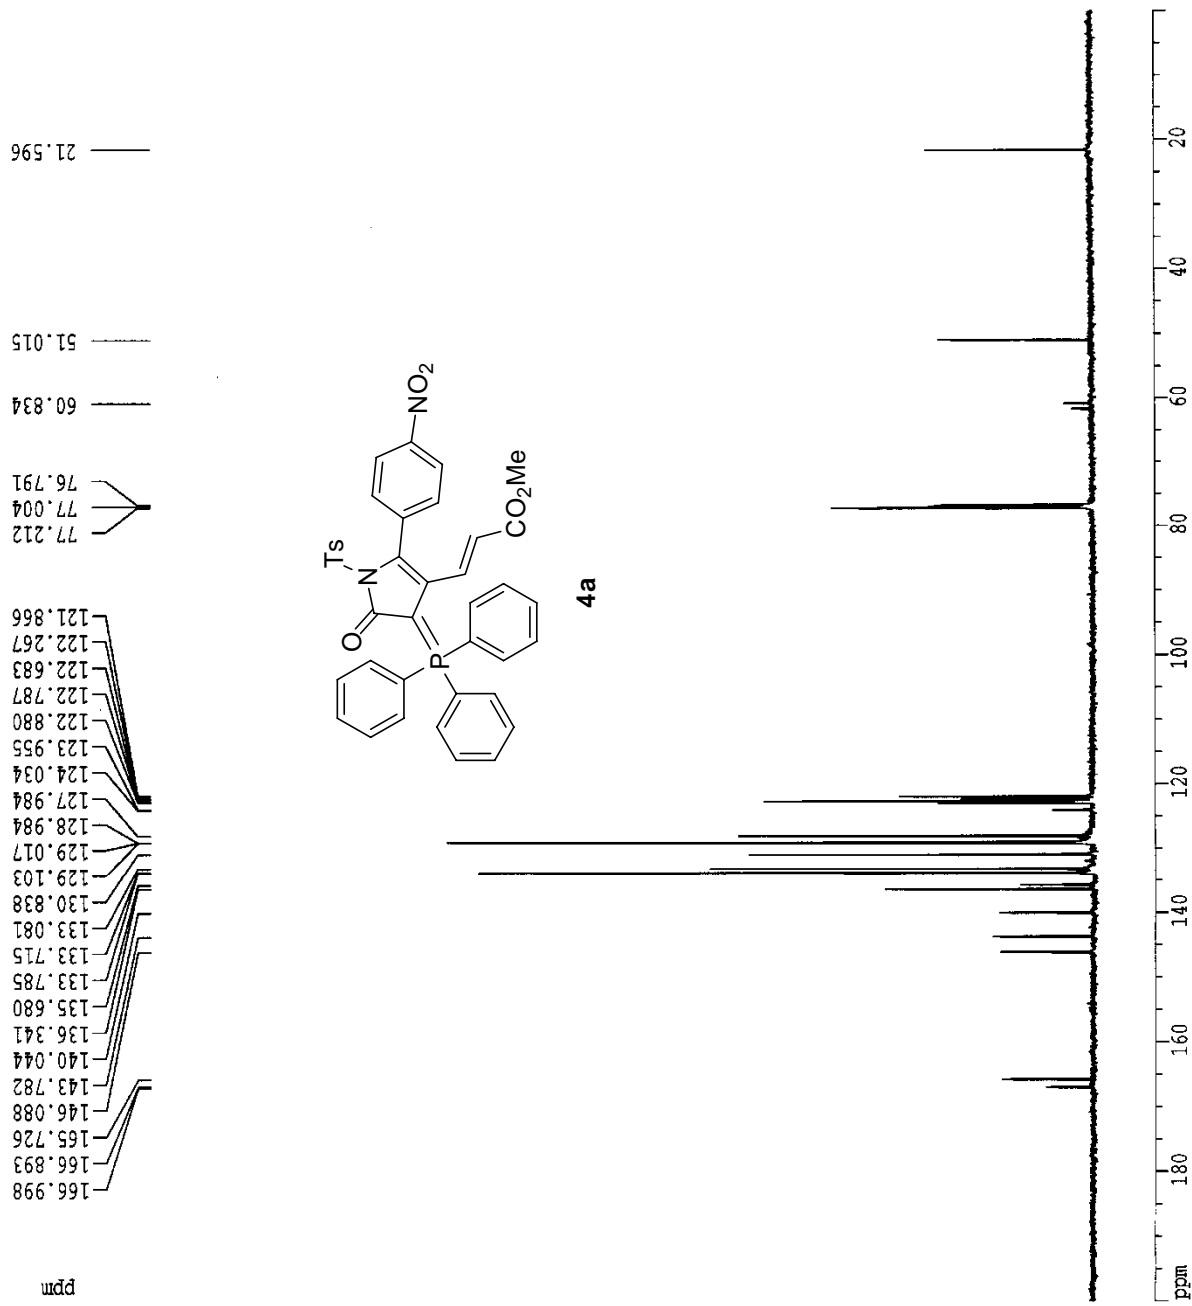

**Figure S3.**  $^1\text{H}$  NMR spectrum of compound **4b** (500 MHz,  $\text{CDCl}_3$ )

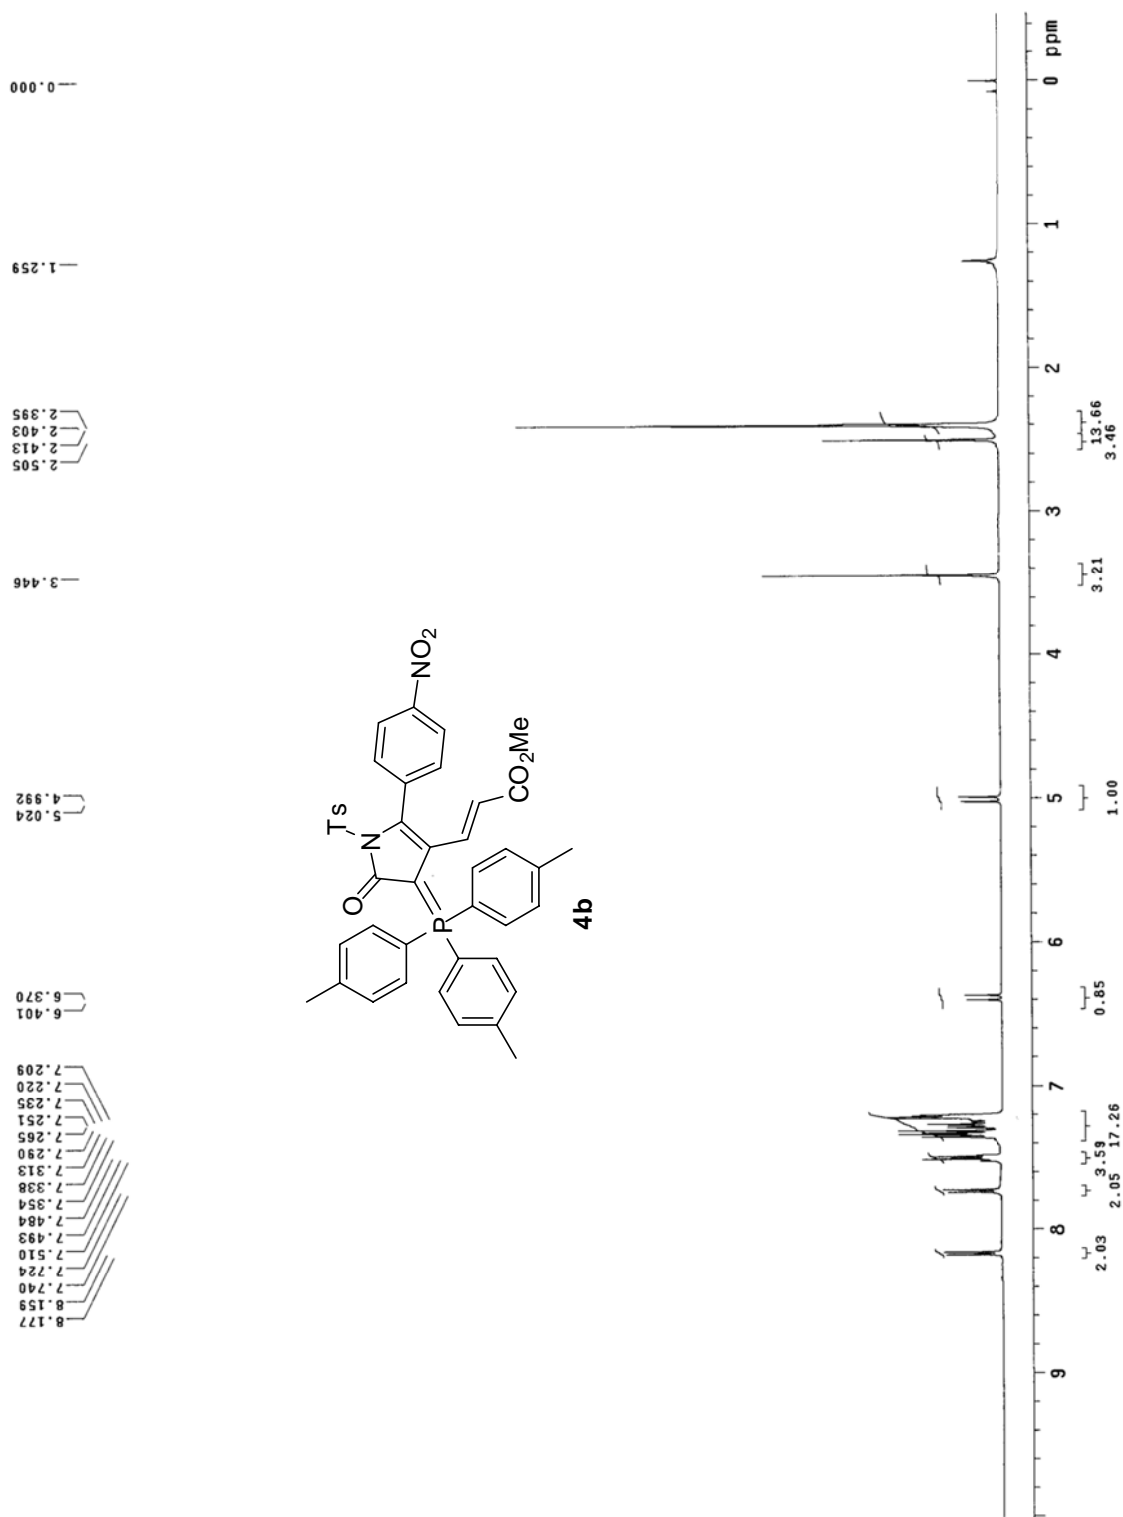

Figure S4.  $^{13}\text{C}$  NMR spectrum of compound **4b** (125 MHz,  $\text{CDCl}_3$ )

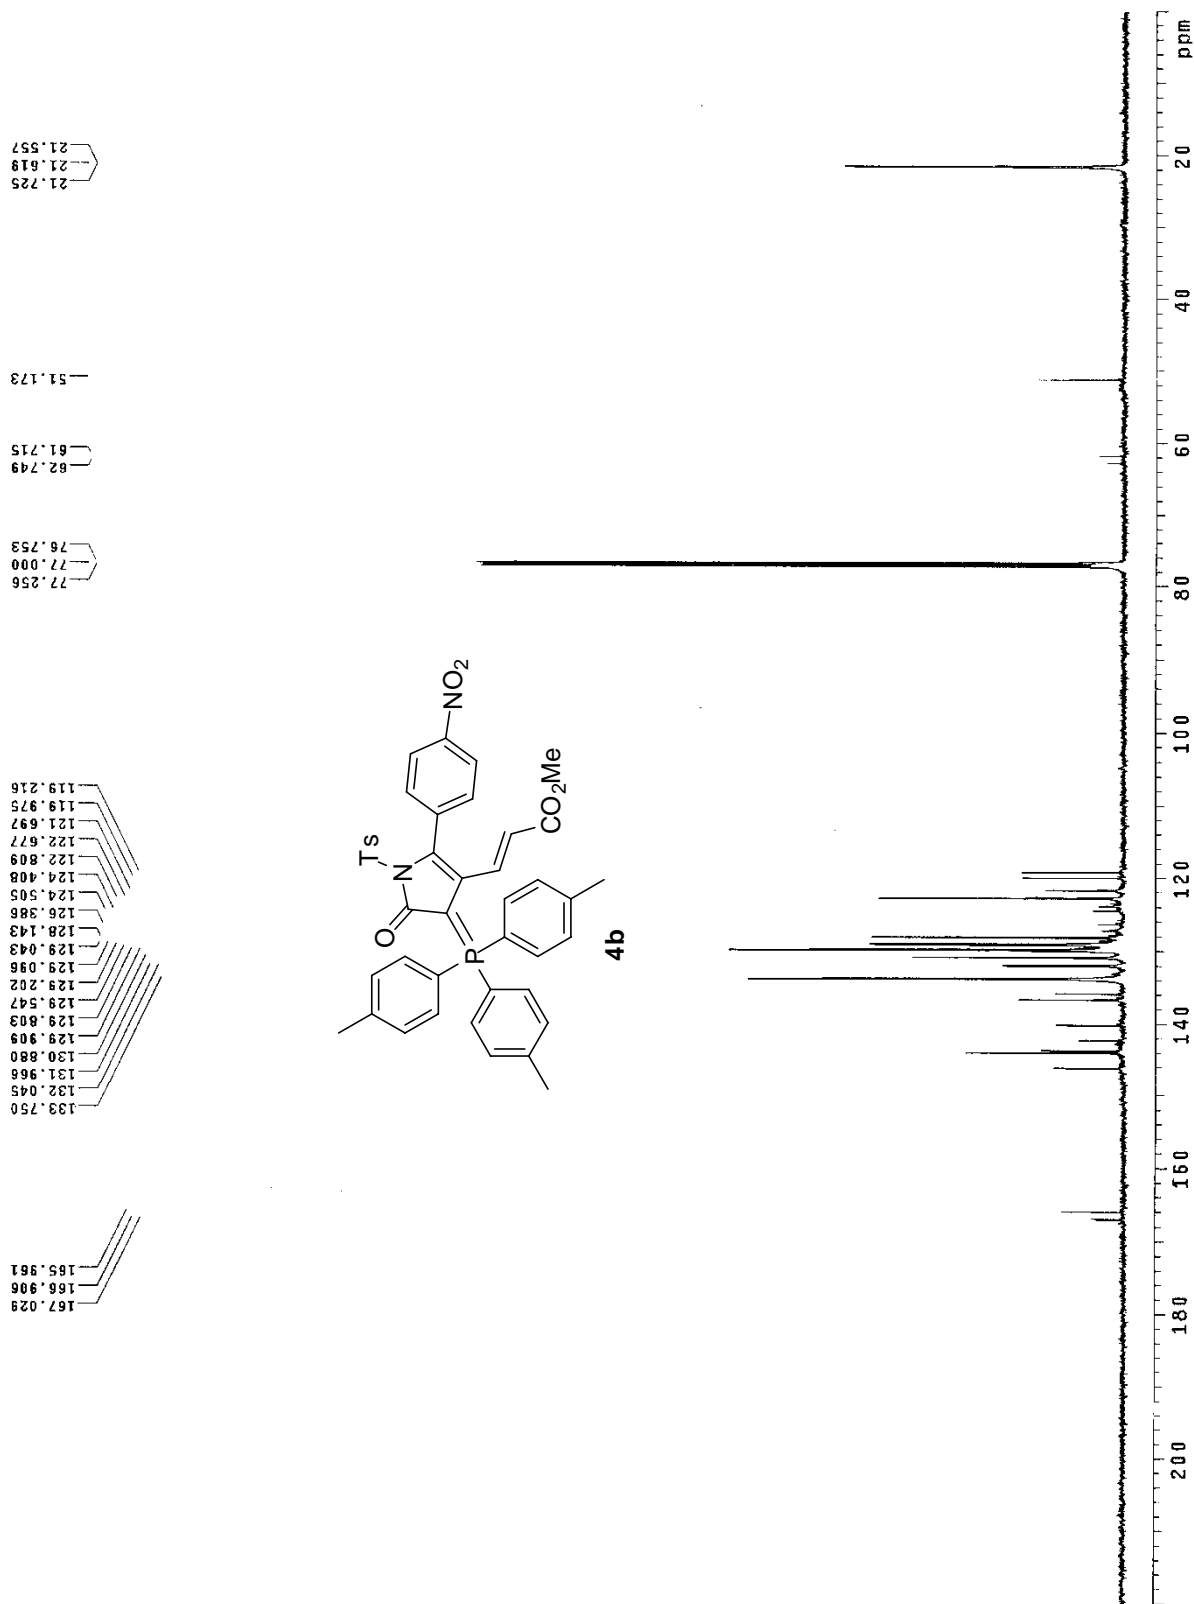

Figure S5.  $^1\text{H}$  NMR spectrum of compound **4c** (300 MHz,  $\text{CDCl}_3$ )

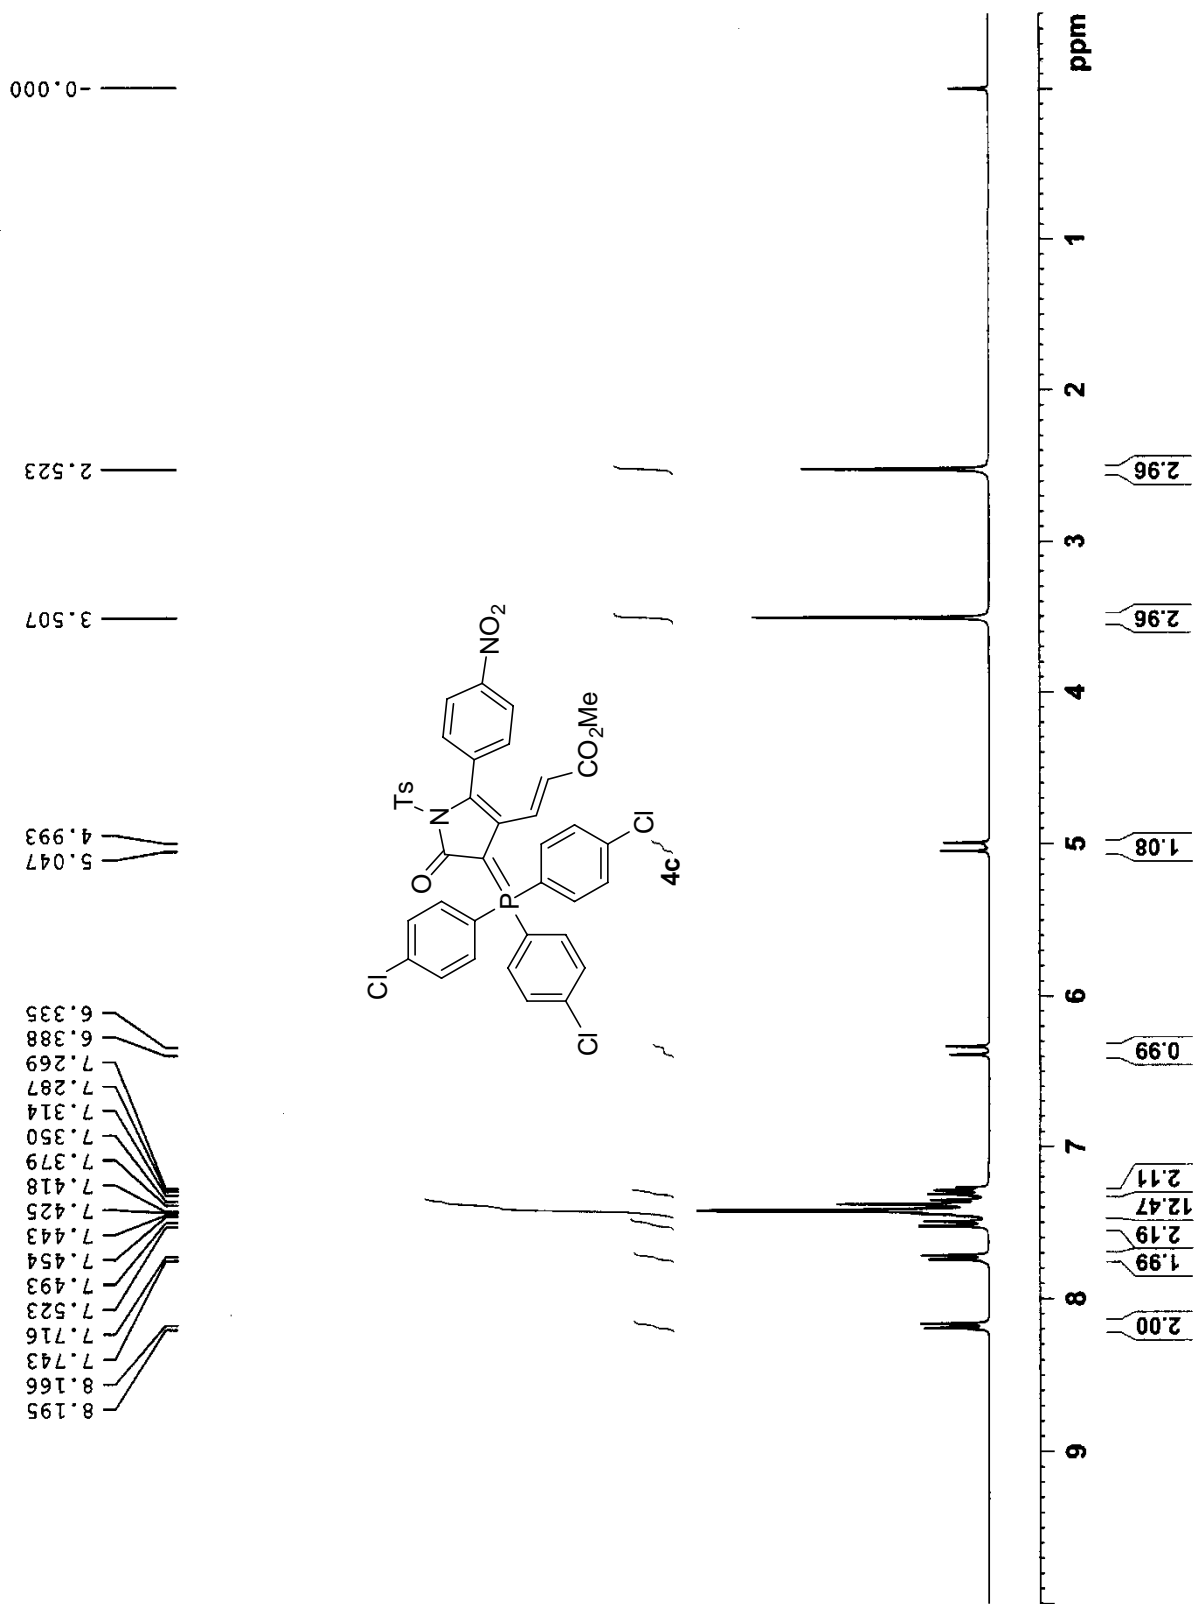

Figure S6.  $^{13}\text{C}$  NMR spectrum of compound **4c** (100 MHz,  $\text{CDCl}_3$ )

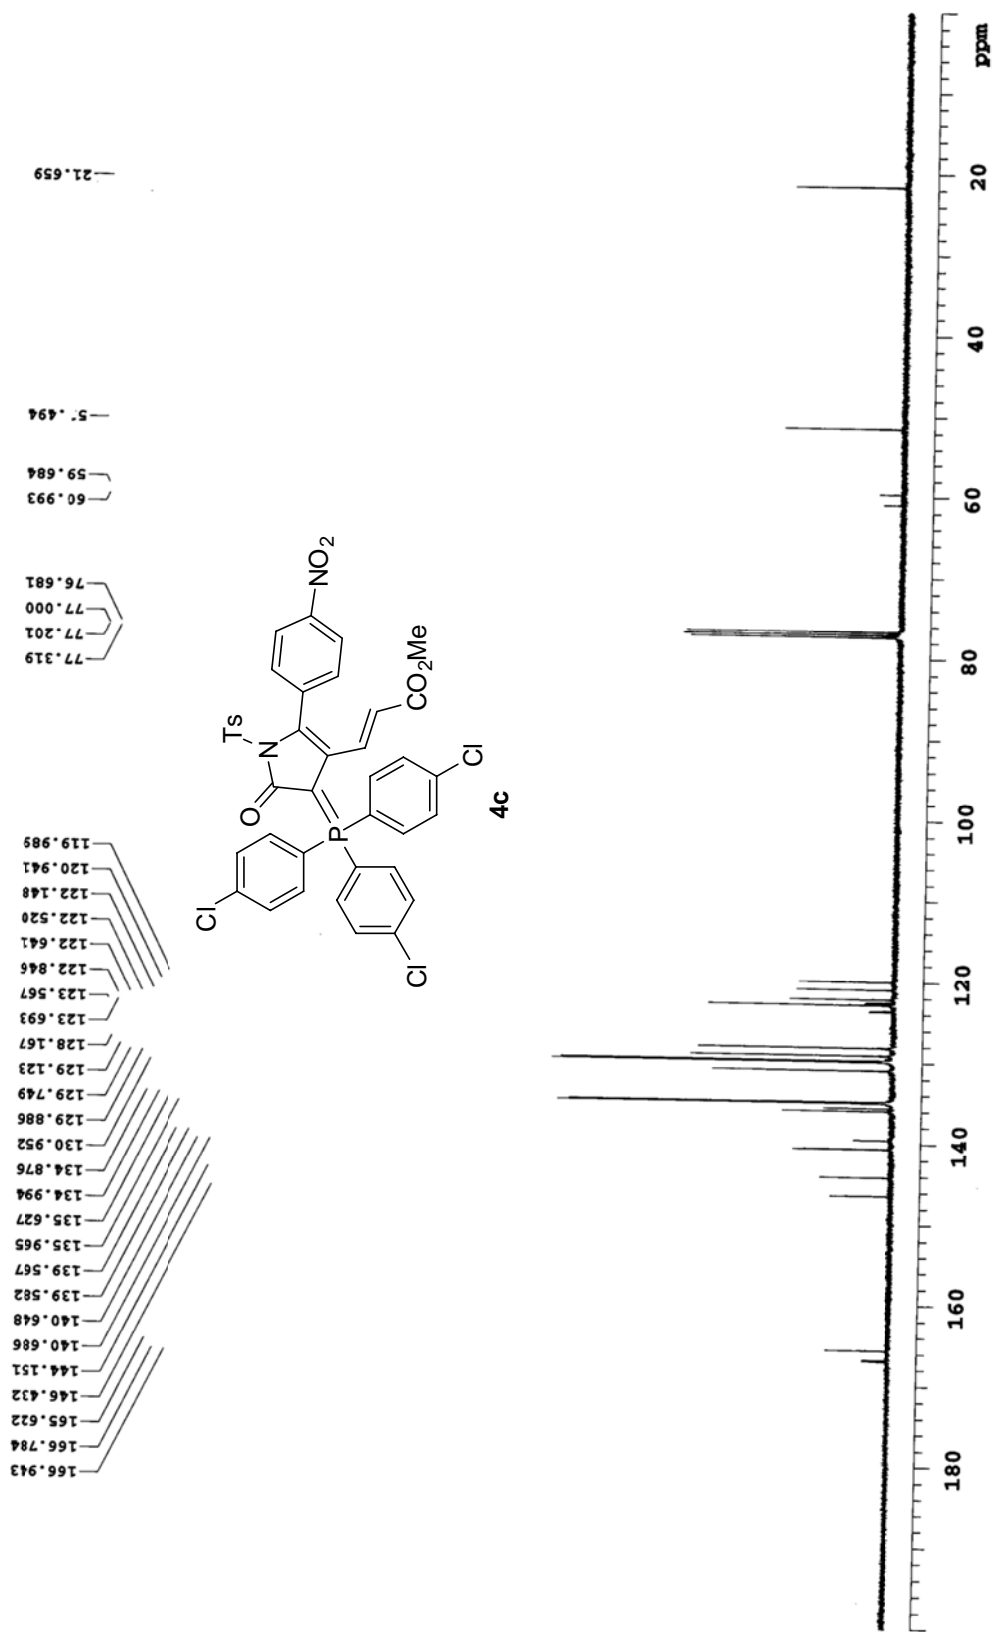

Figure S7. <sup>1</sup>H NMR spectrum of compound **4d** (500 MHz, CDCl<sub>3</sub>)

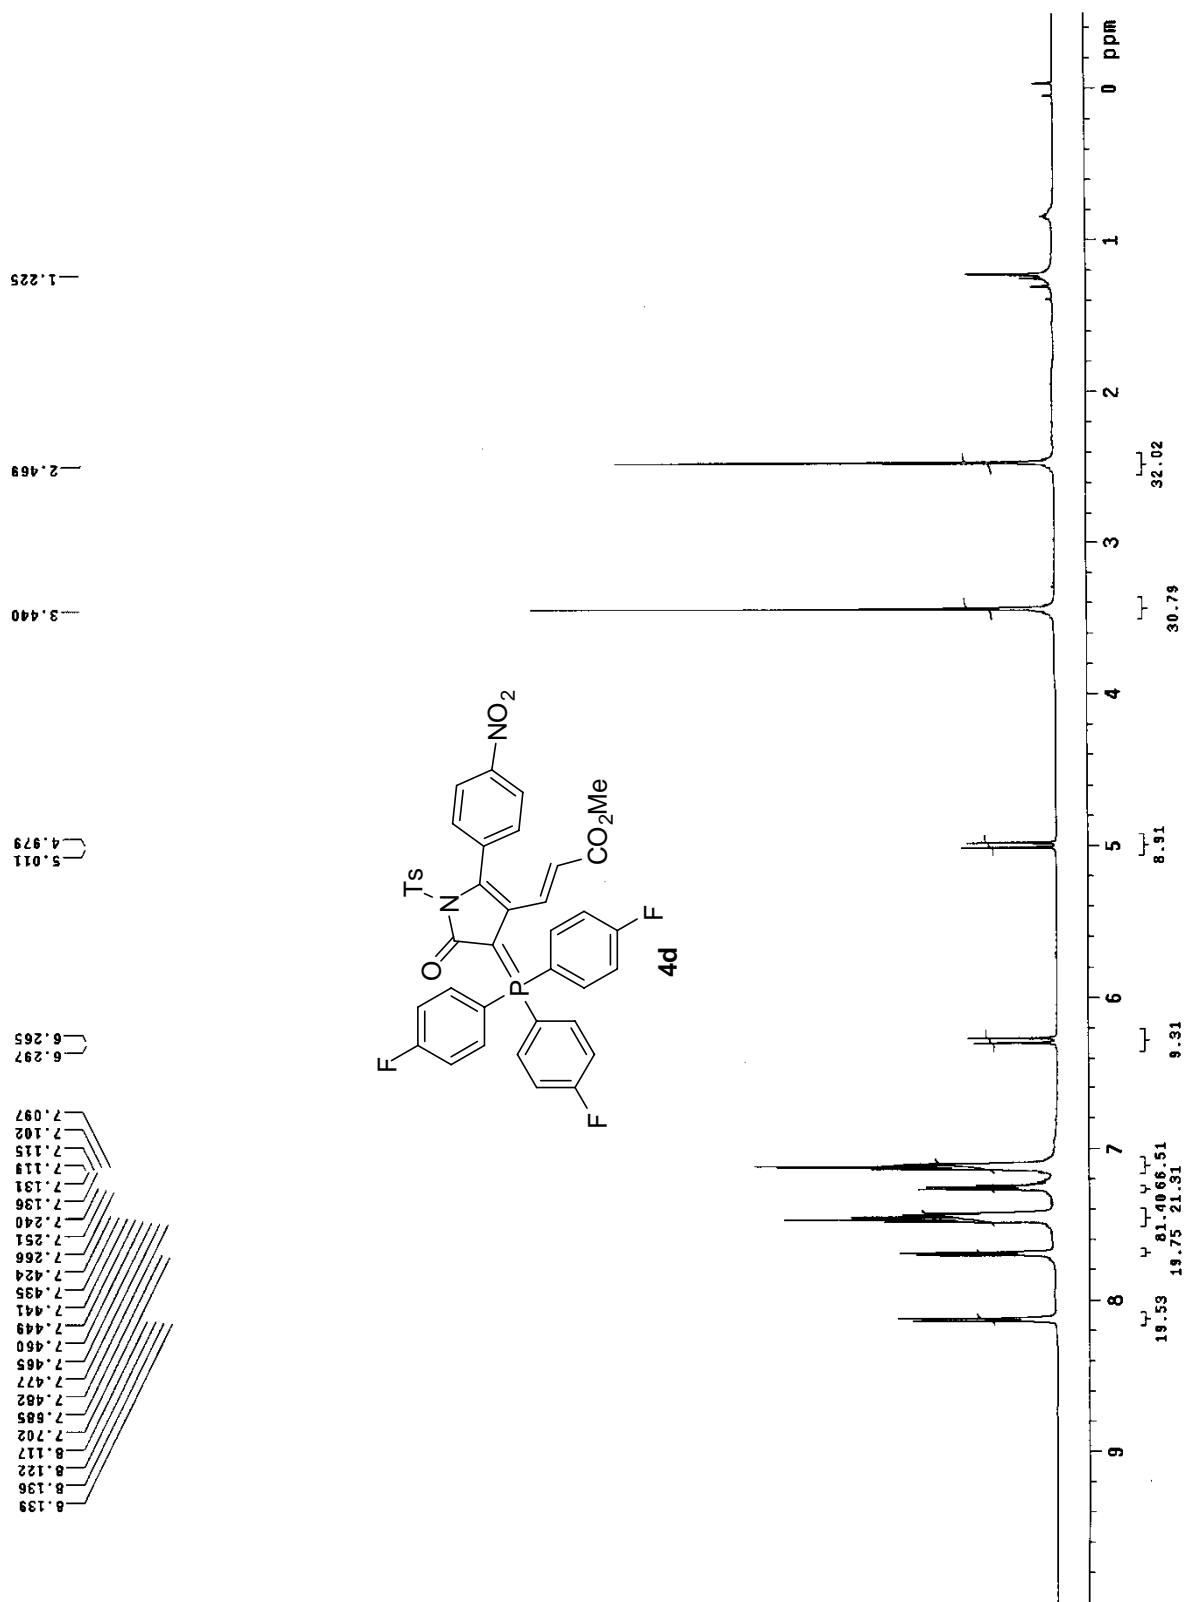



**Figure S8.**  $^{13}\text{C}$  NMR spectrum of compound **4d** (125 MHz,  $\text{CDCl}_3$ )

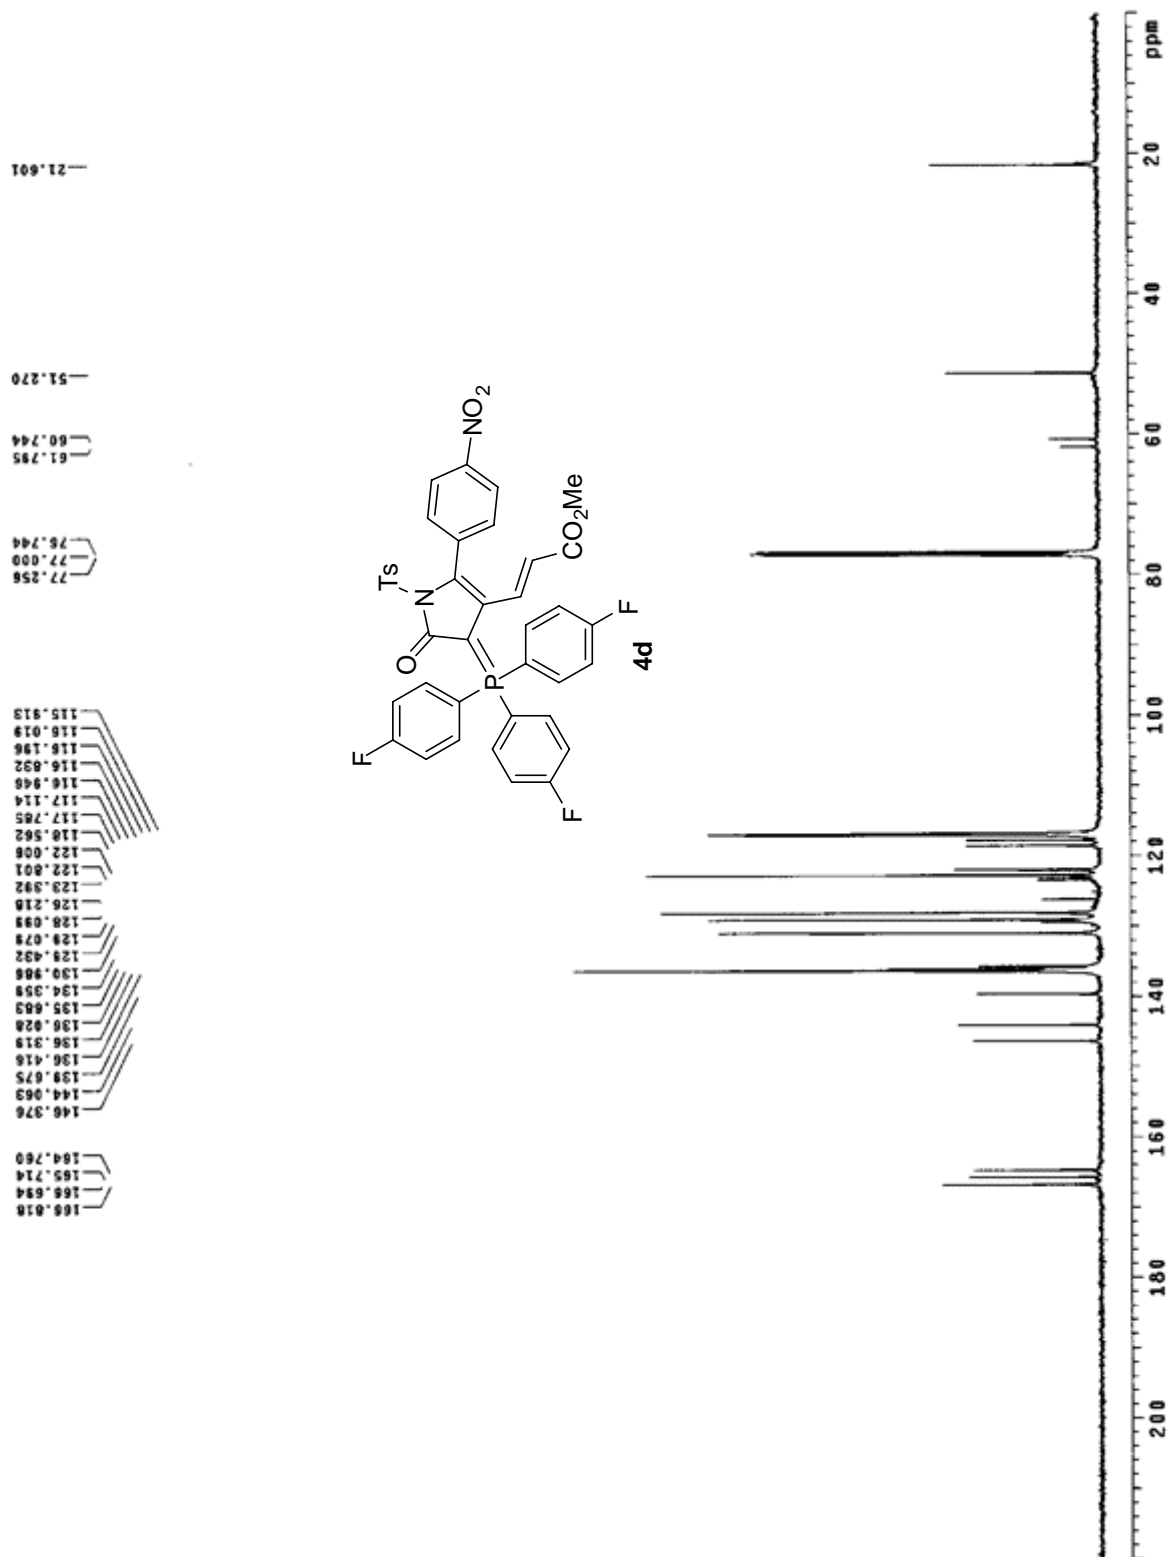

Figure S9.  $^1\text{H}$  NMR spectrum of compound **4e** (300 MHz,  $\text{CDCl}_3$ )

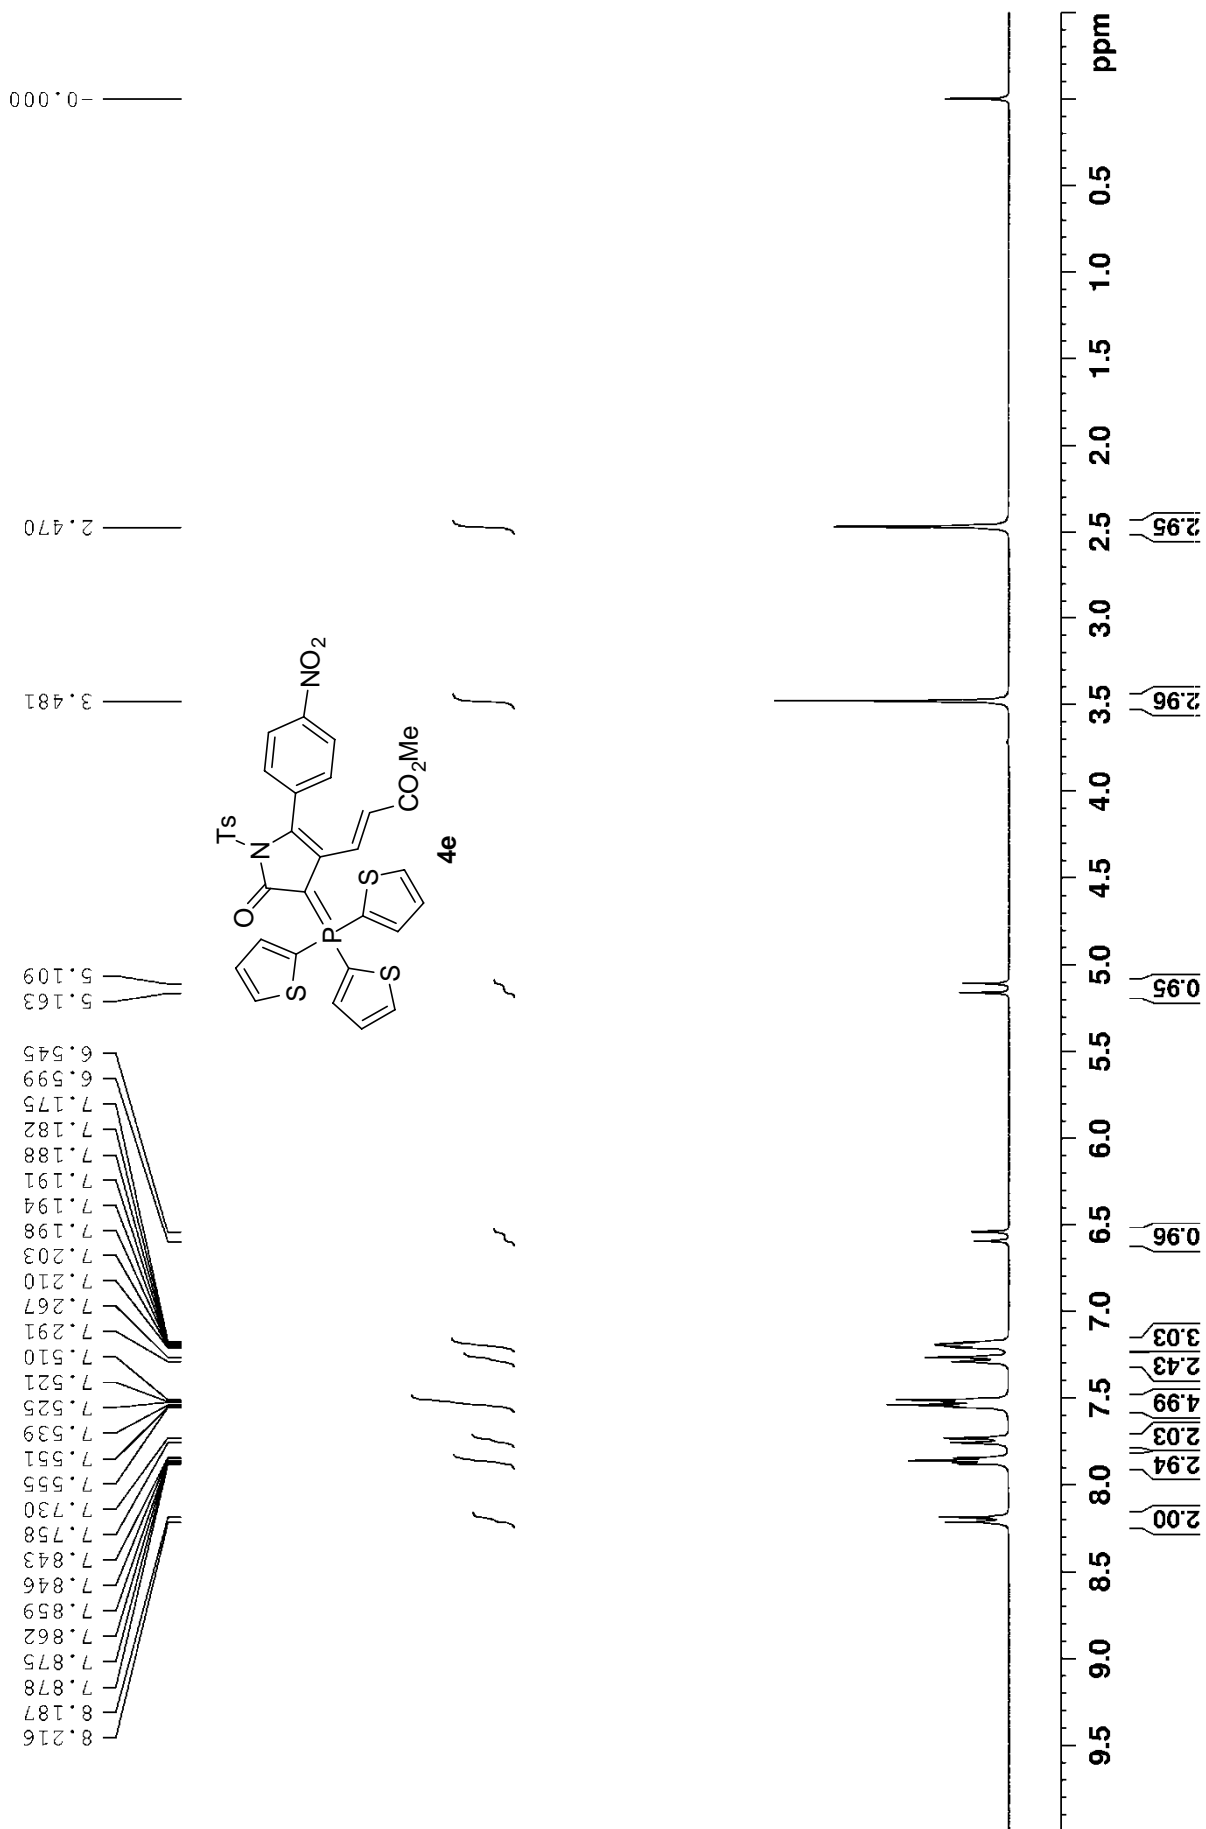

Figure S10.  $^{13}\text{C}$  NMR spectrum of compound **4e** (75 MHz,  $\text{CDCl}_3$ )

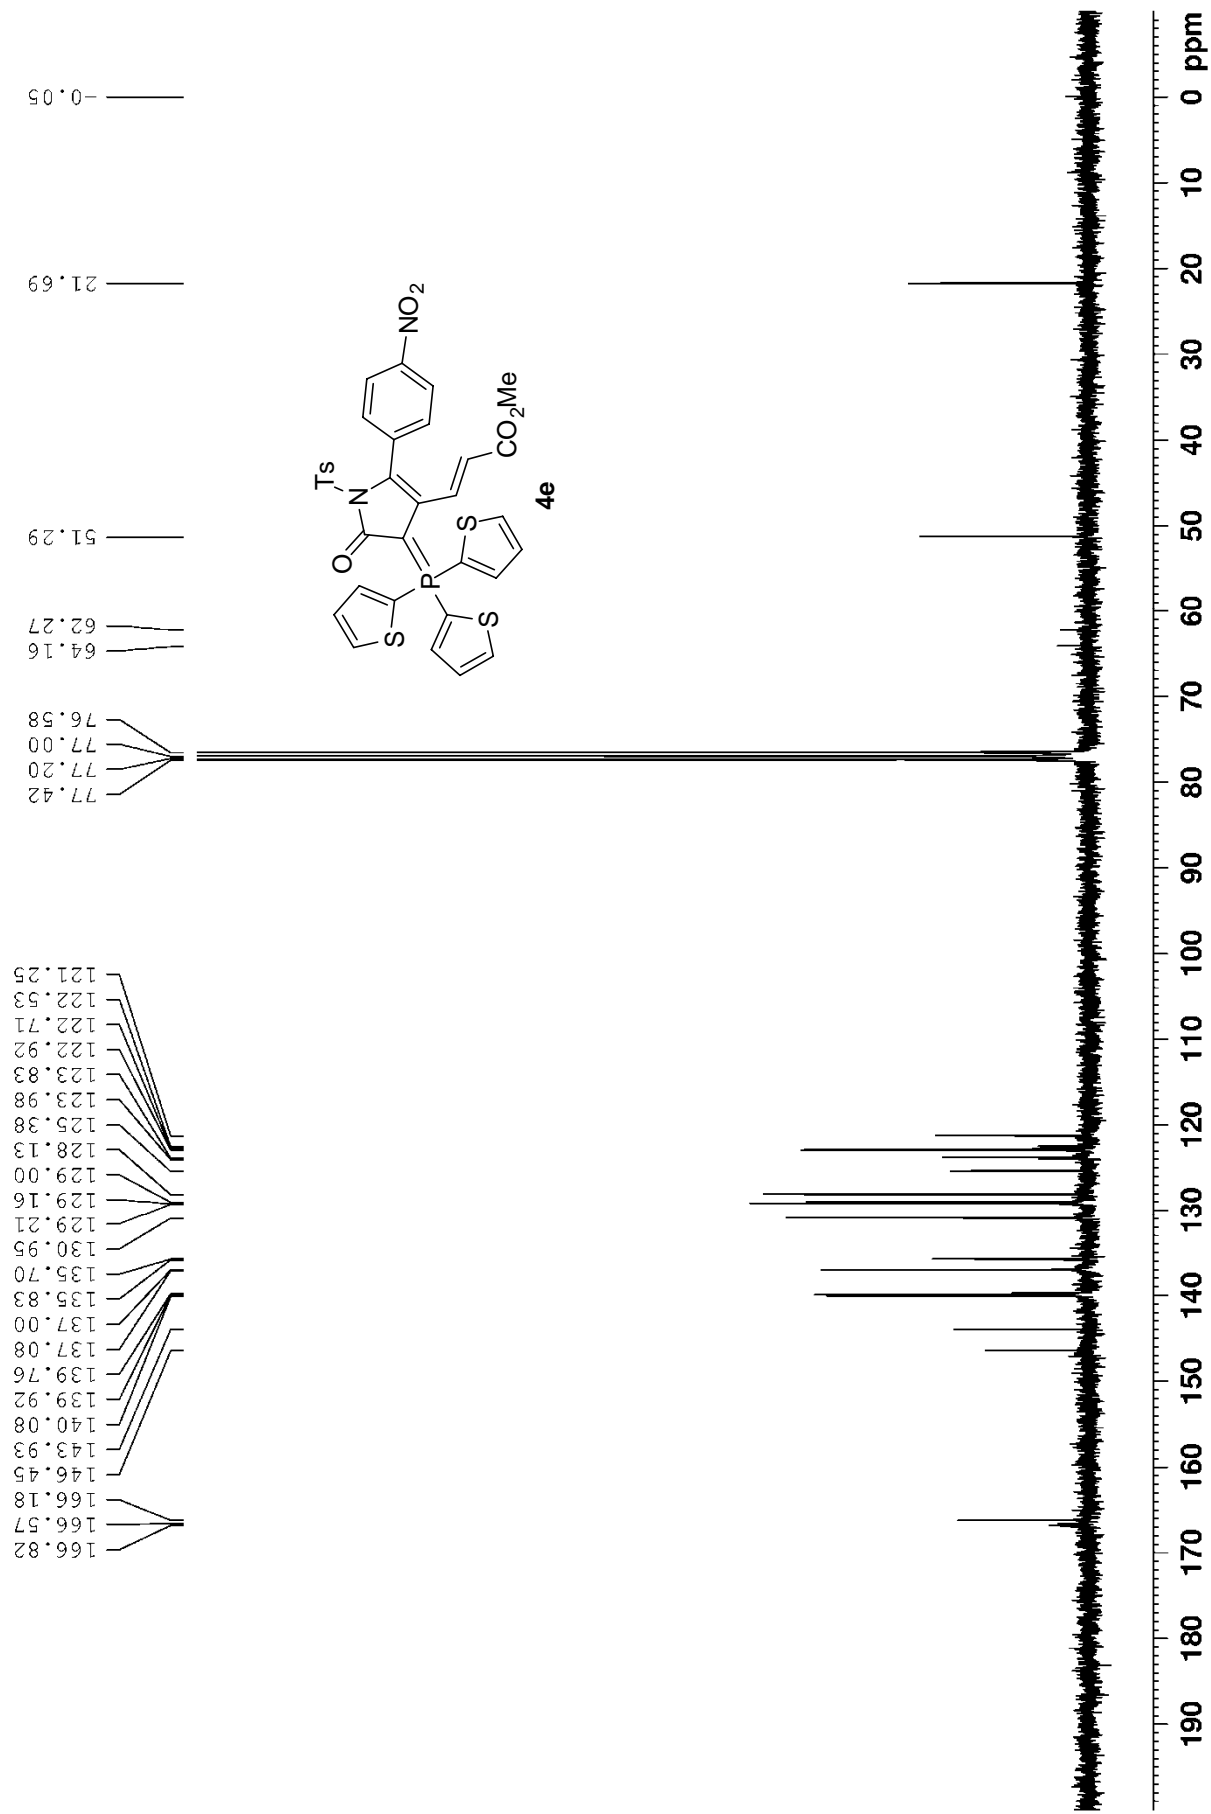

Figure S11. <sup>1</sup>H NMR spectrum of compound **4f** (300 MHz, CDCl<sub>3</sub>)

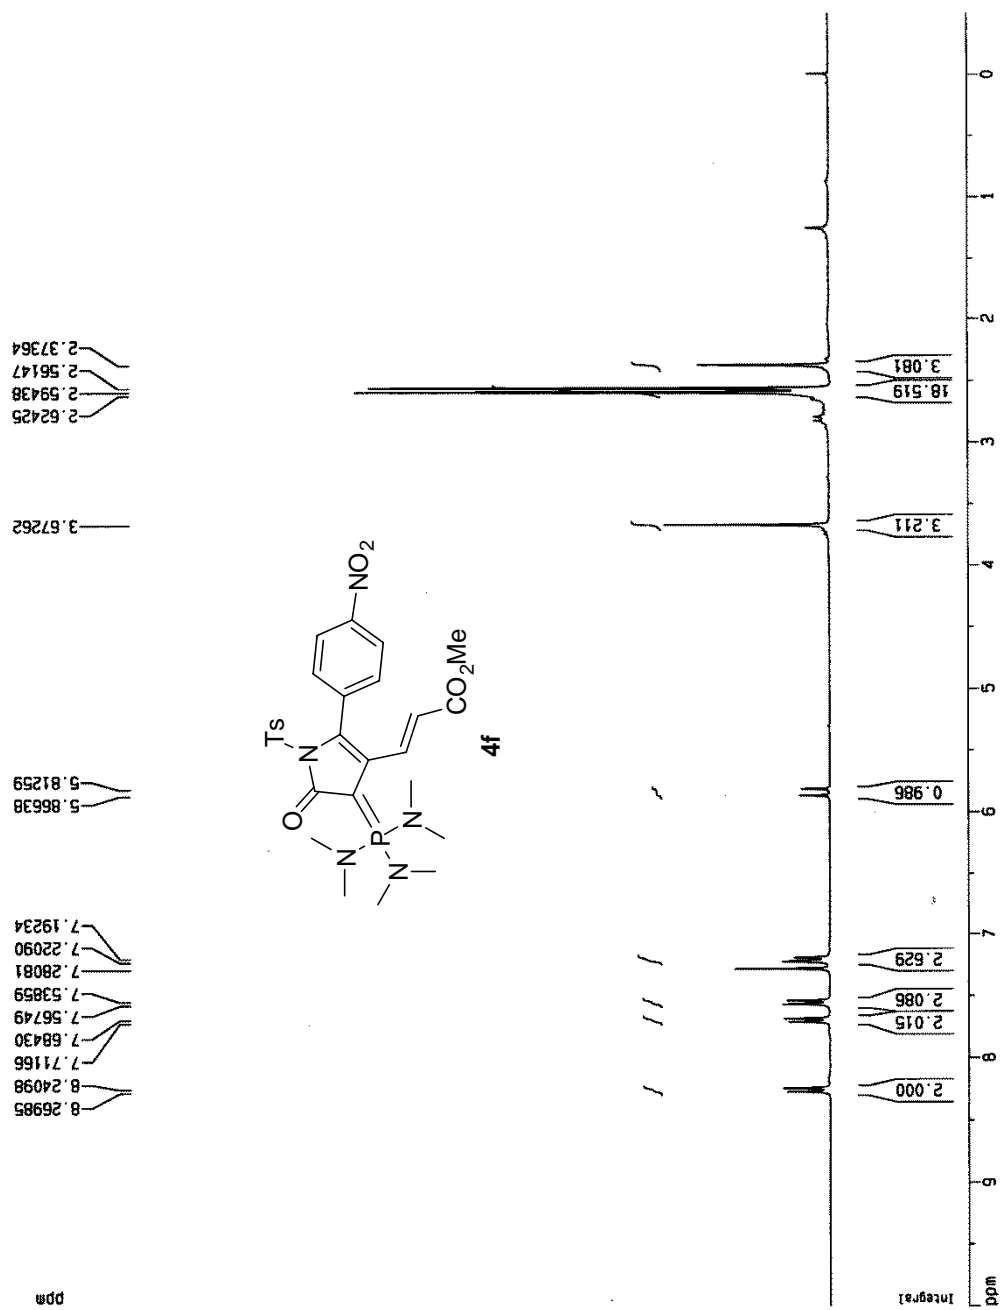

Figure S12.  $^{13}\text{C}$  NMR spectrum of compound **4f** (75 MHz,  $\text{CDCl}_3$ )

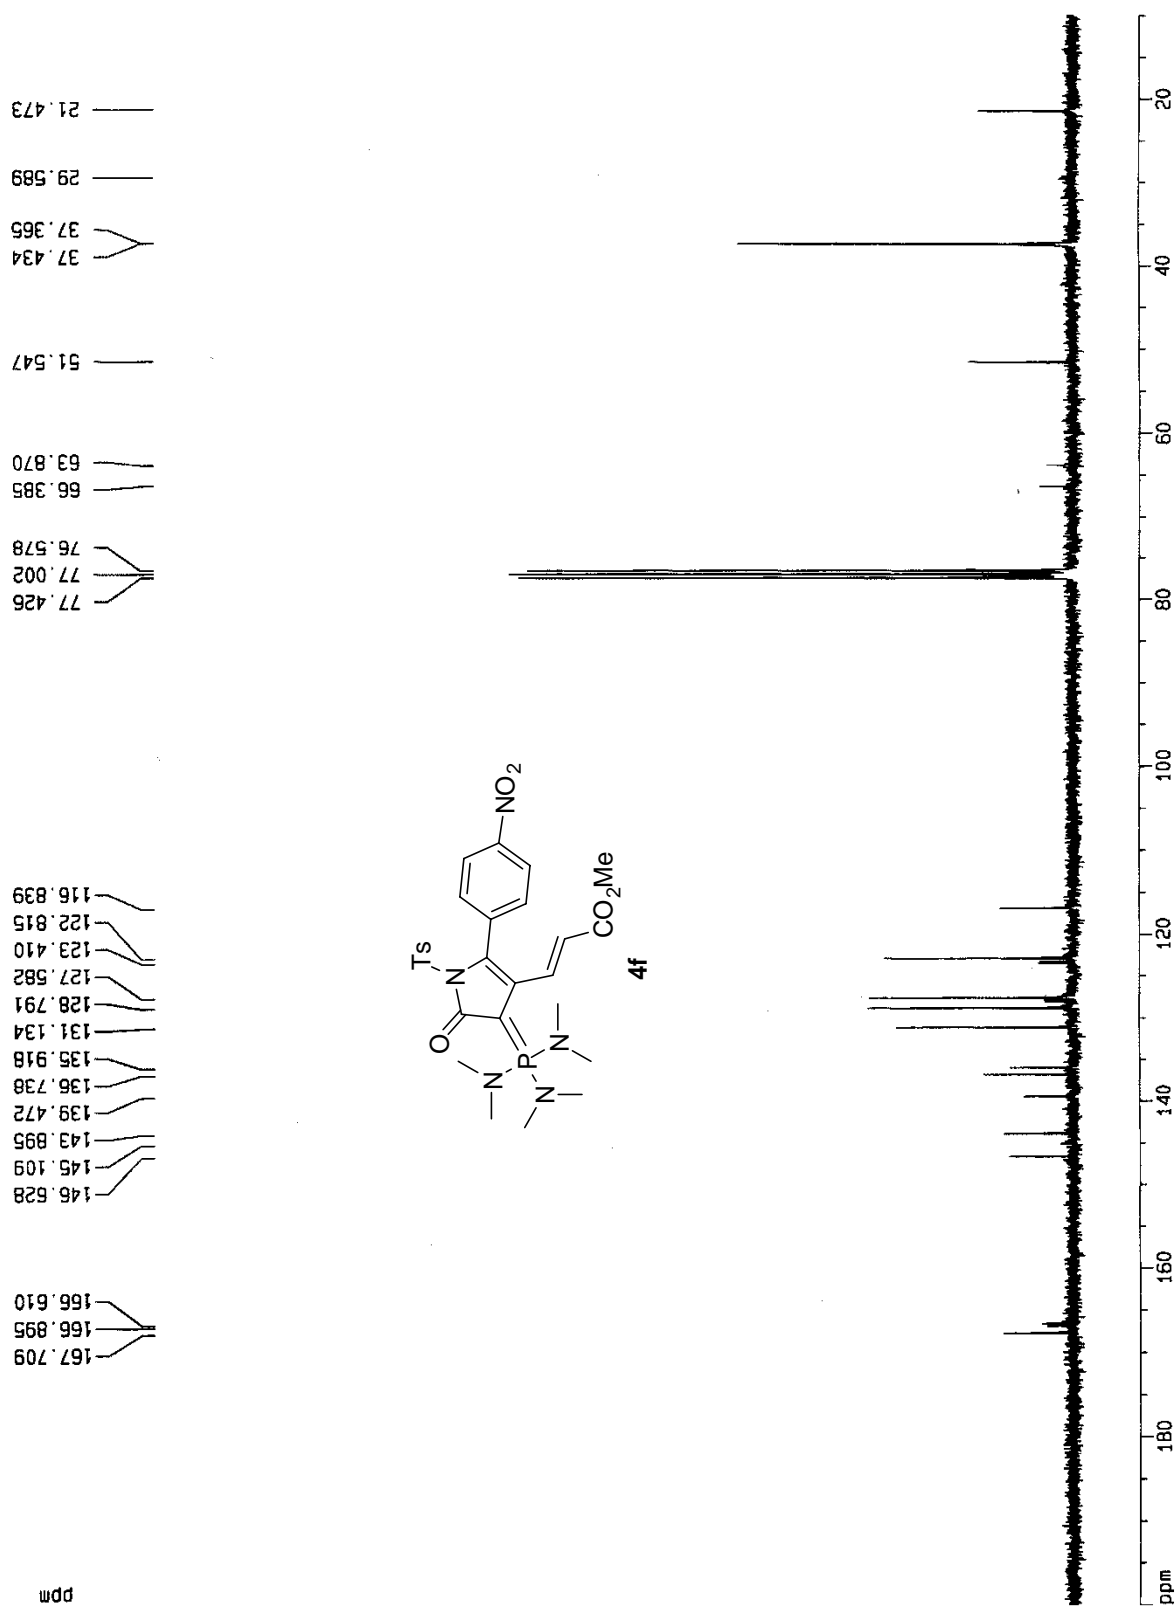

Figure S13.  $^1\text{H}$  NMR spectrum of compound **4g** (300 MHz,  $\text{CDCl}_3$ )

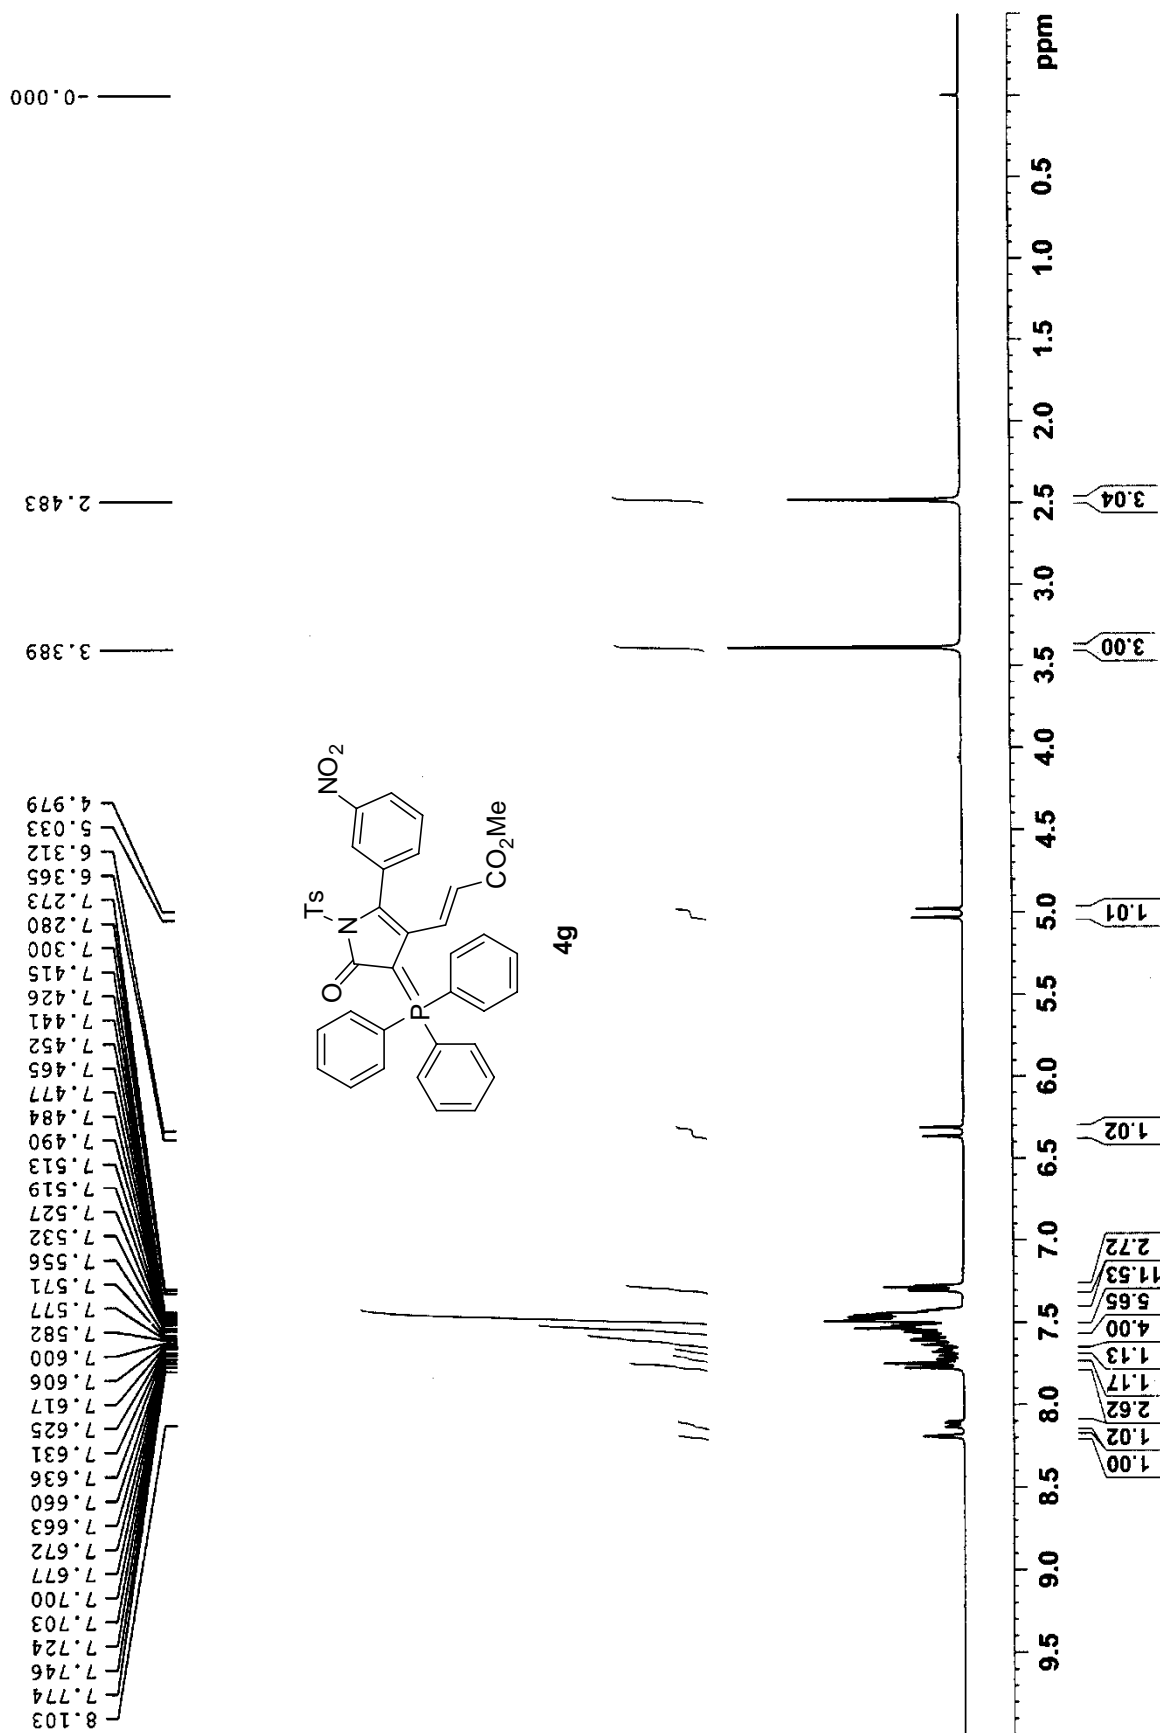

Figure S14.  $^{13}\text{C}$  NMR spectrum of compound **4g** (75 MHz,  $\text{CDCl}_3$ )

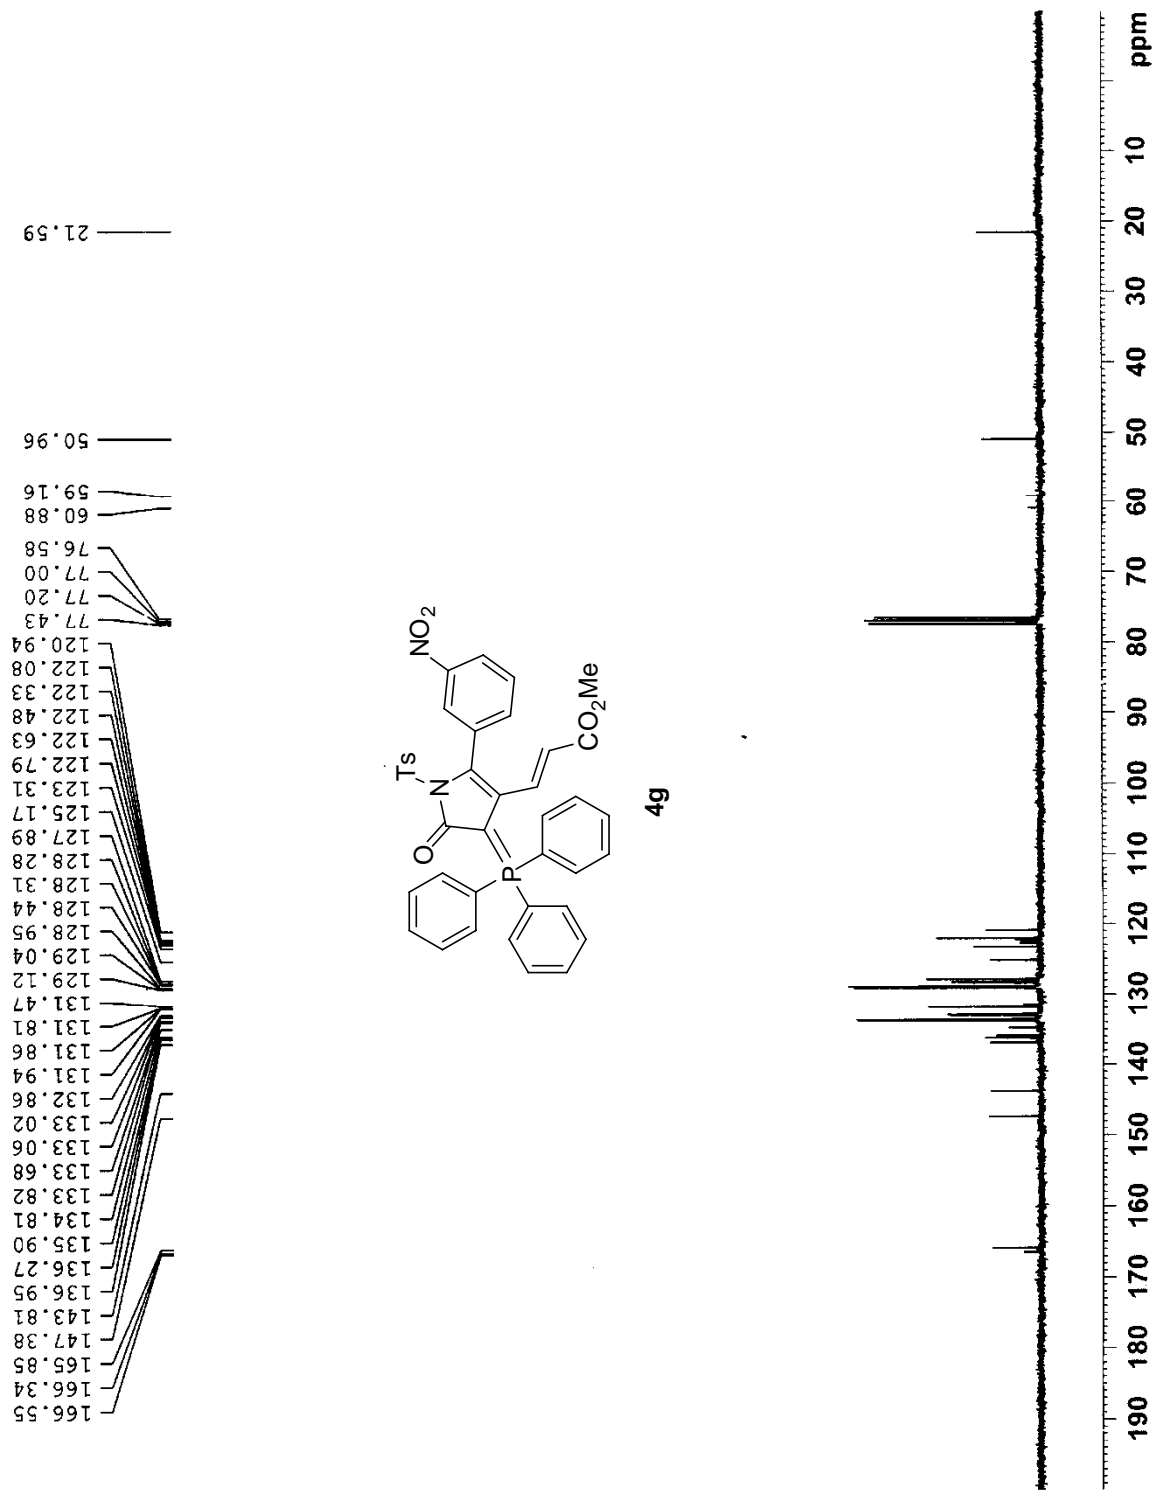

Figure S15. <sup>1</sup>H NMR spectrum of compound **4h** (500 MHz, CDCl<sub>3</sub>)

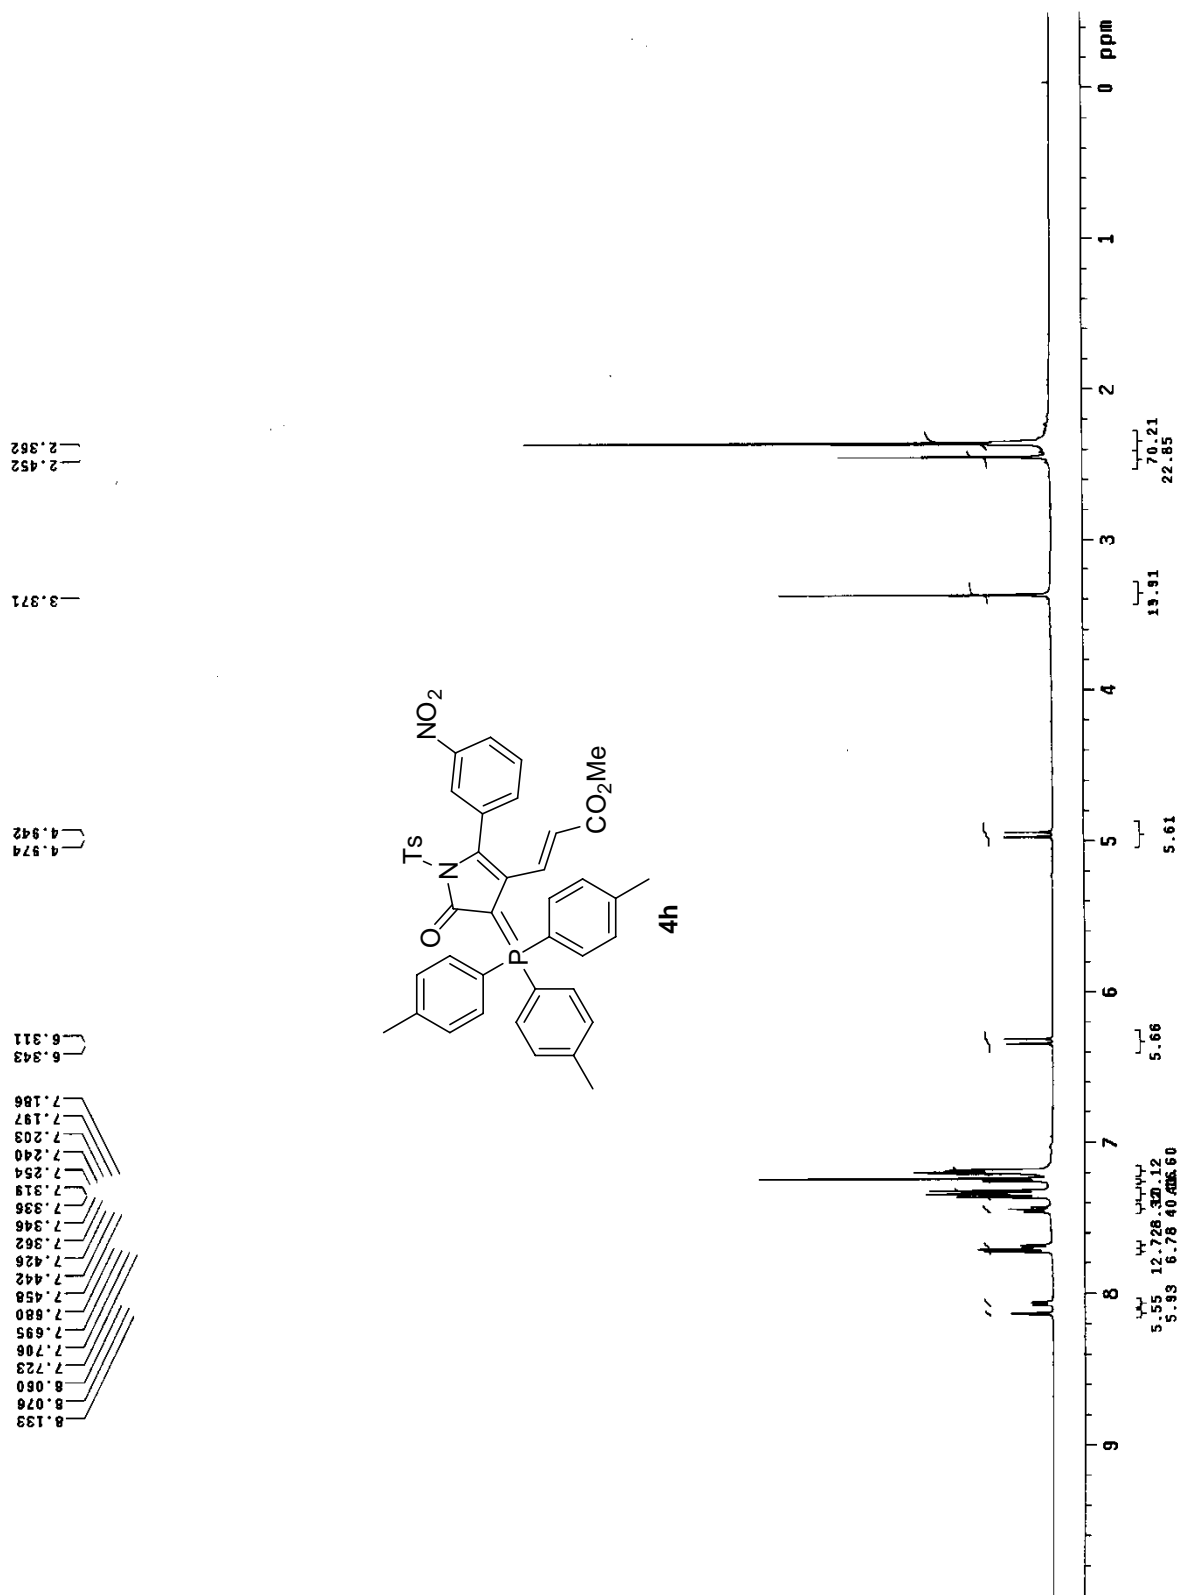



**Figure S16.**  $^{13}\text{C}$  NMR spectrum of compound **4h** (125 MHz,  $\text{CDCl}_3$ )

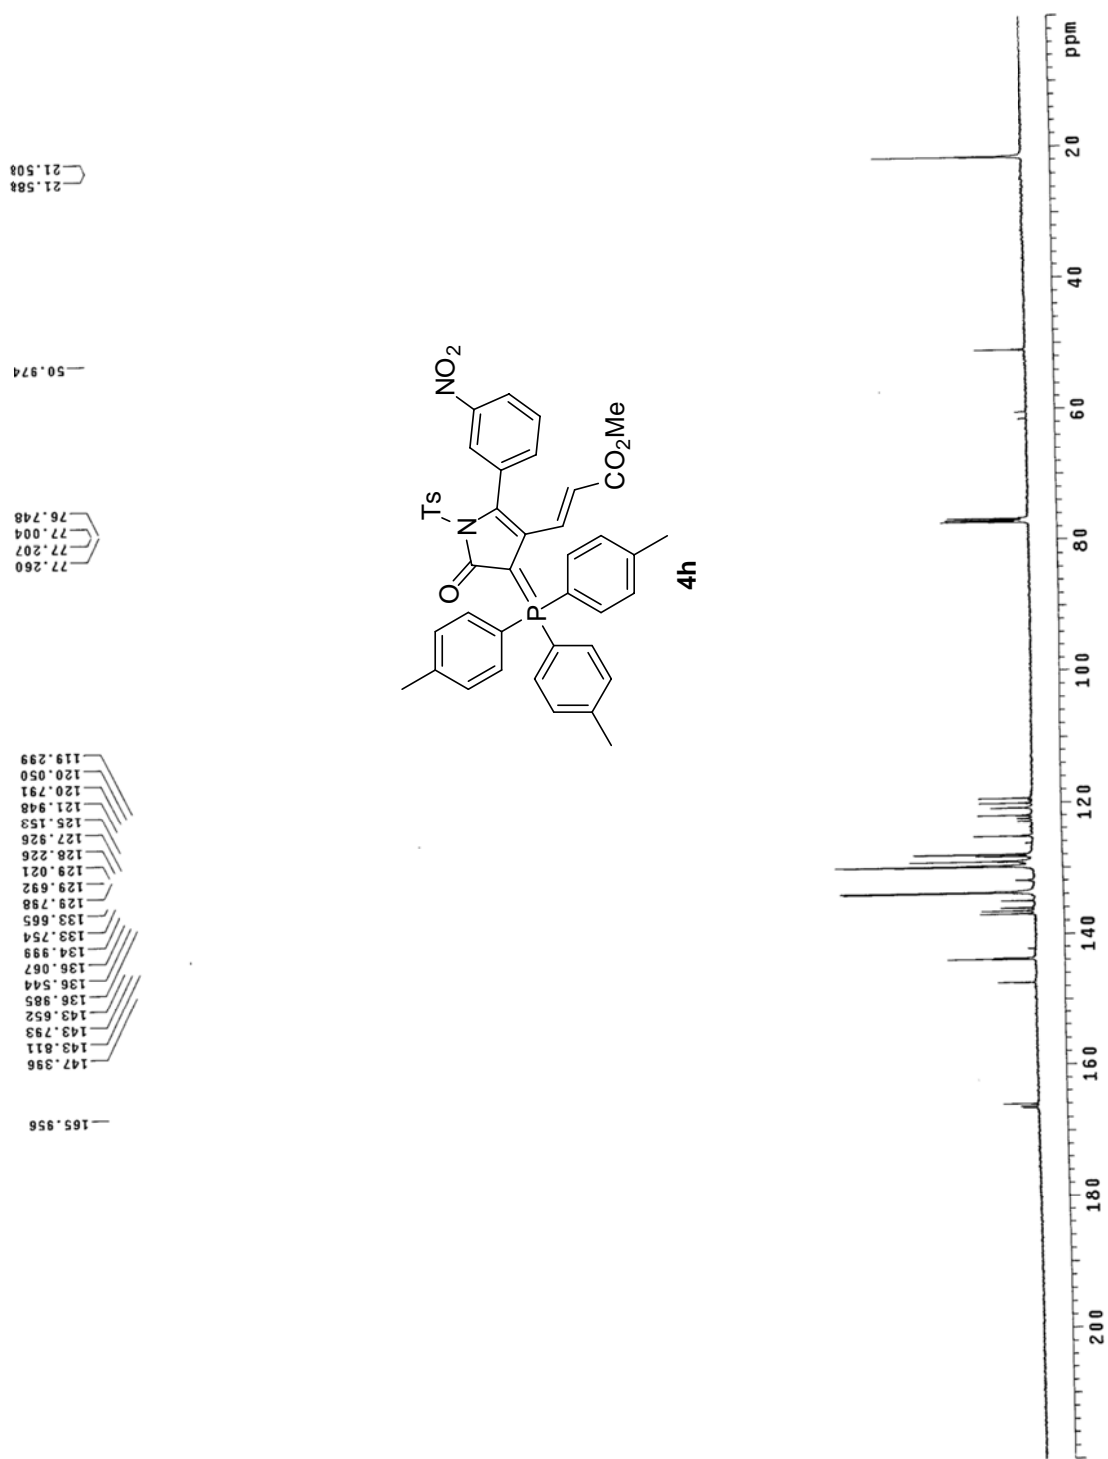

Figure S17. <sup>1</sup>H NMR spectrum of compound **4i** (400 MHz, CDCl<sub>3</sub>)

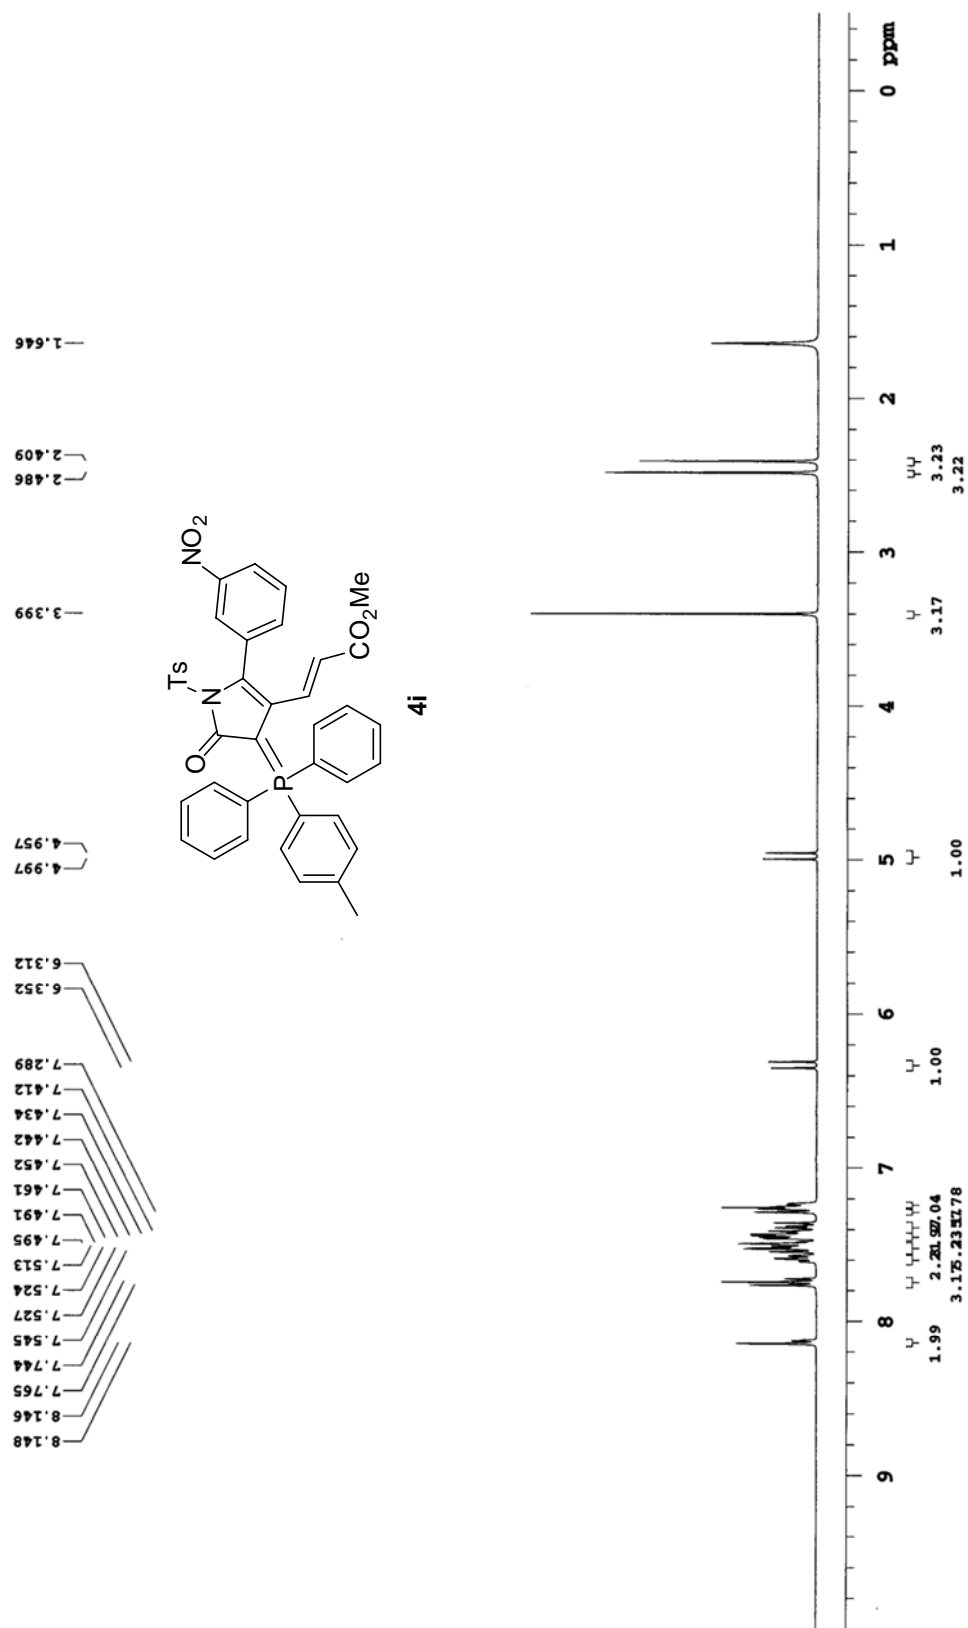

Figure S18.  $^{13}\text{C}$  NMR spectrum of compound **4i** (75 MHz,  $\text{CDCl}_3$ )

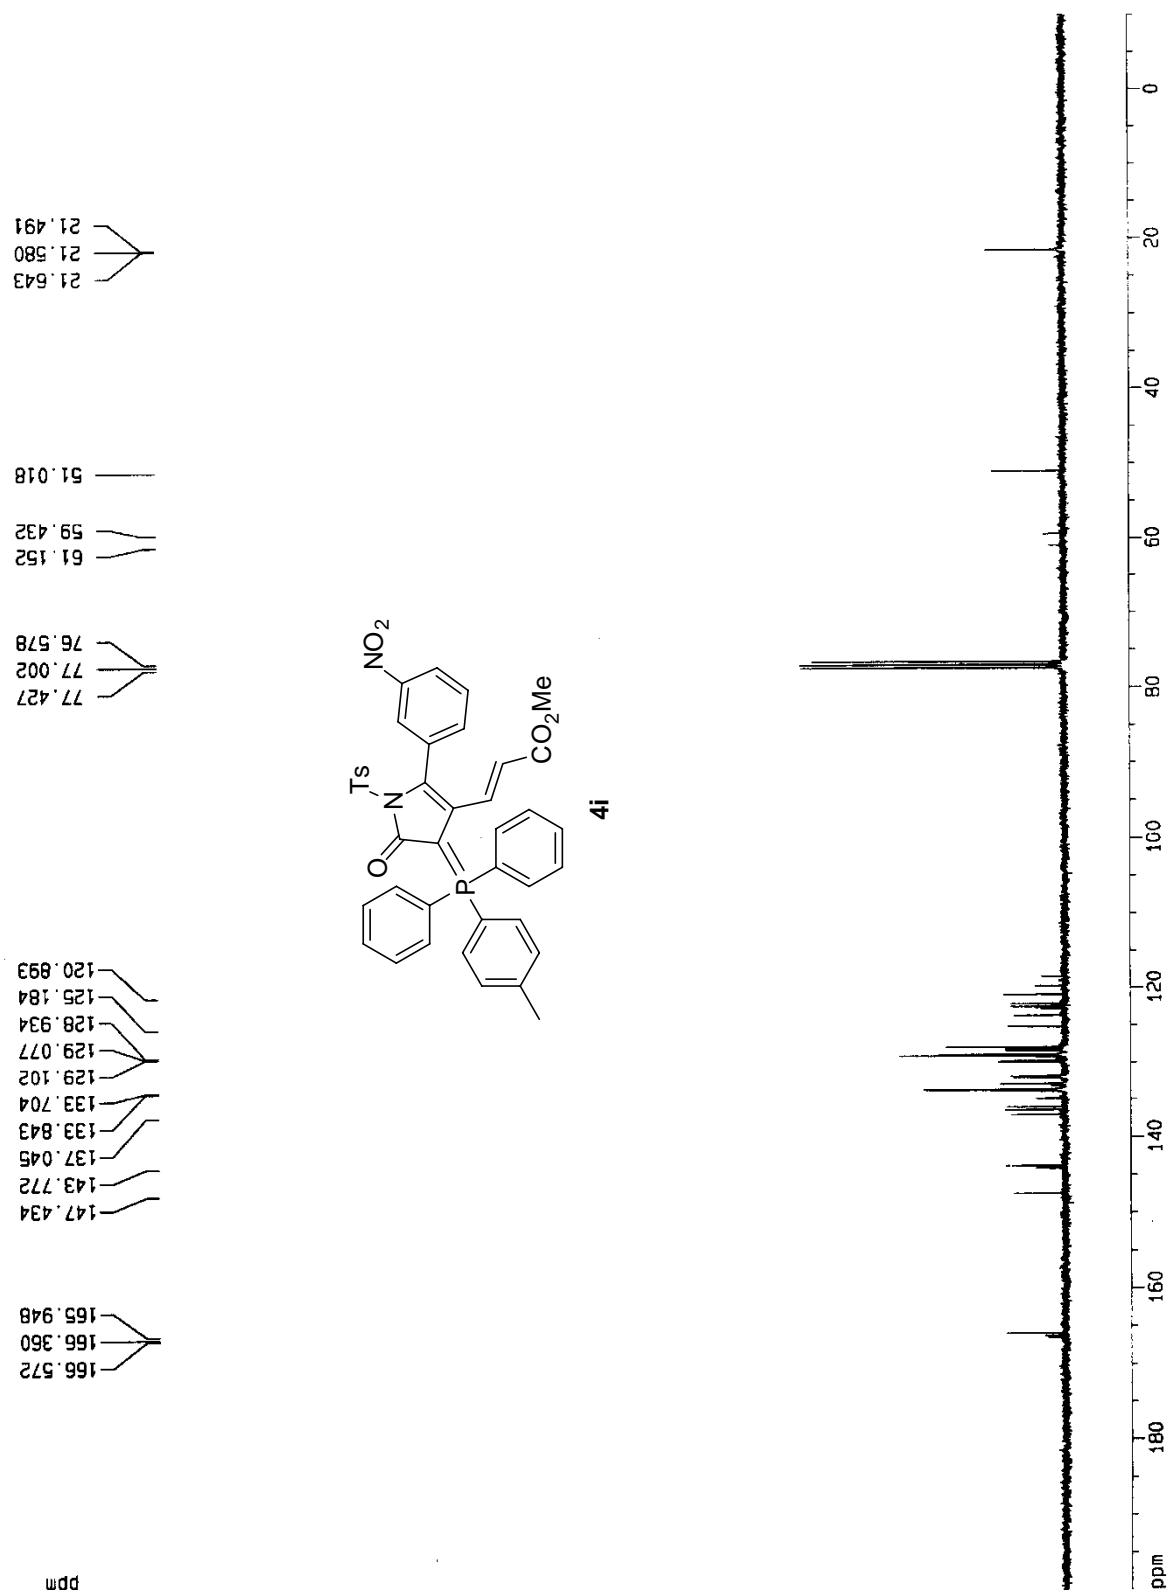

Figure S19.  $^1\text{H}$  NMR spectrum of compound **4j** (300 MHz,  $\text{CDCl}_3$ )

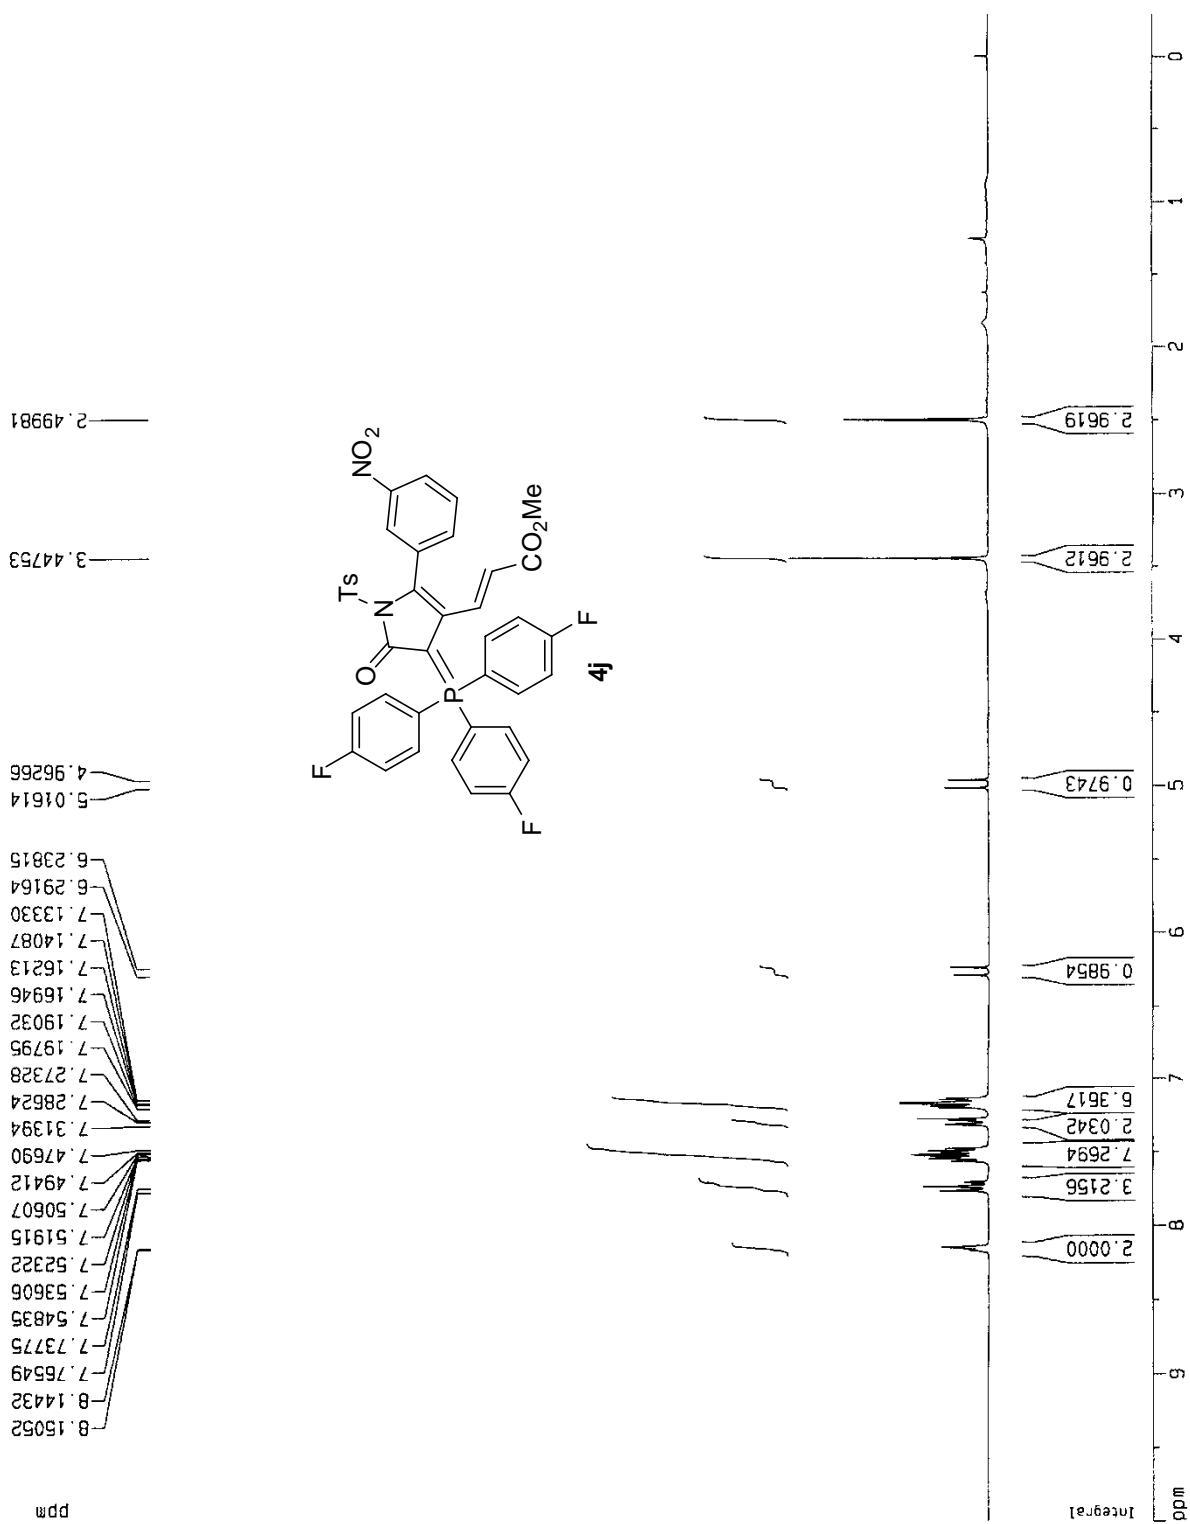

Figure S20.  $^{13}\text{C}$  NMR spectrum of compound 4j (75 MHz,  $\text{CDCl}_3$ )

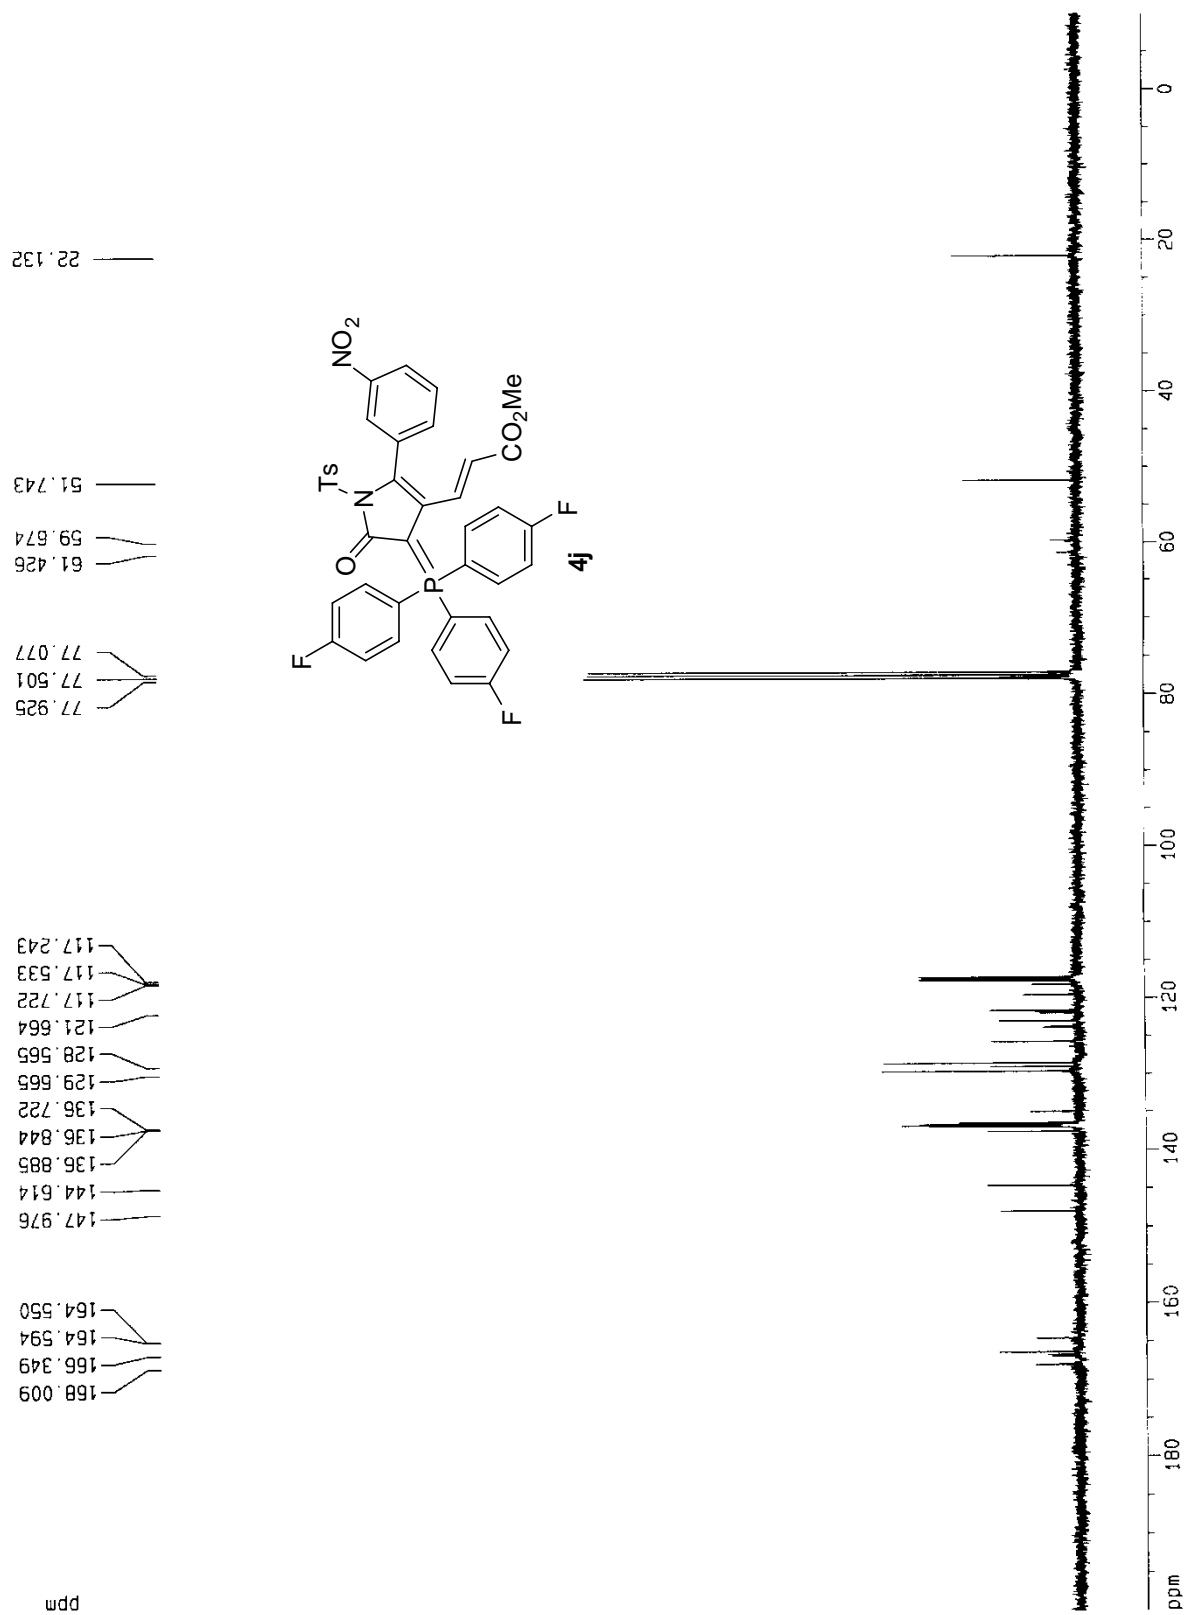

Figure S21. <sup>1</sup>H NMR spectrum of compound **4k** (300 MHz, CDCl<sub>3</sub>)

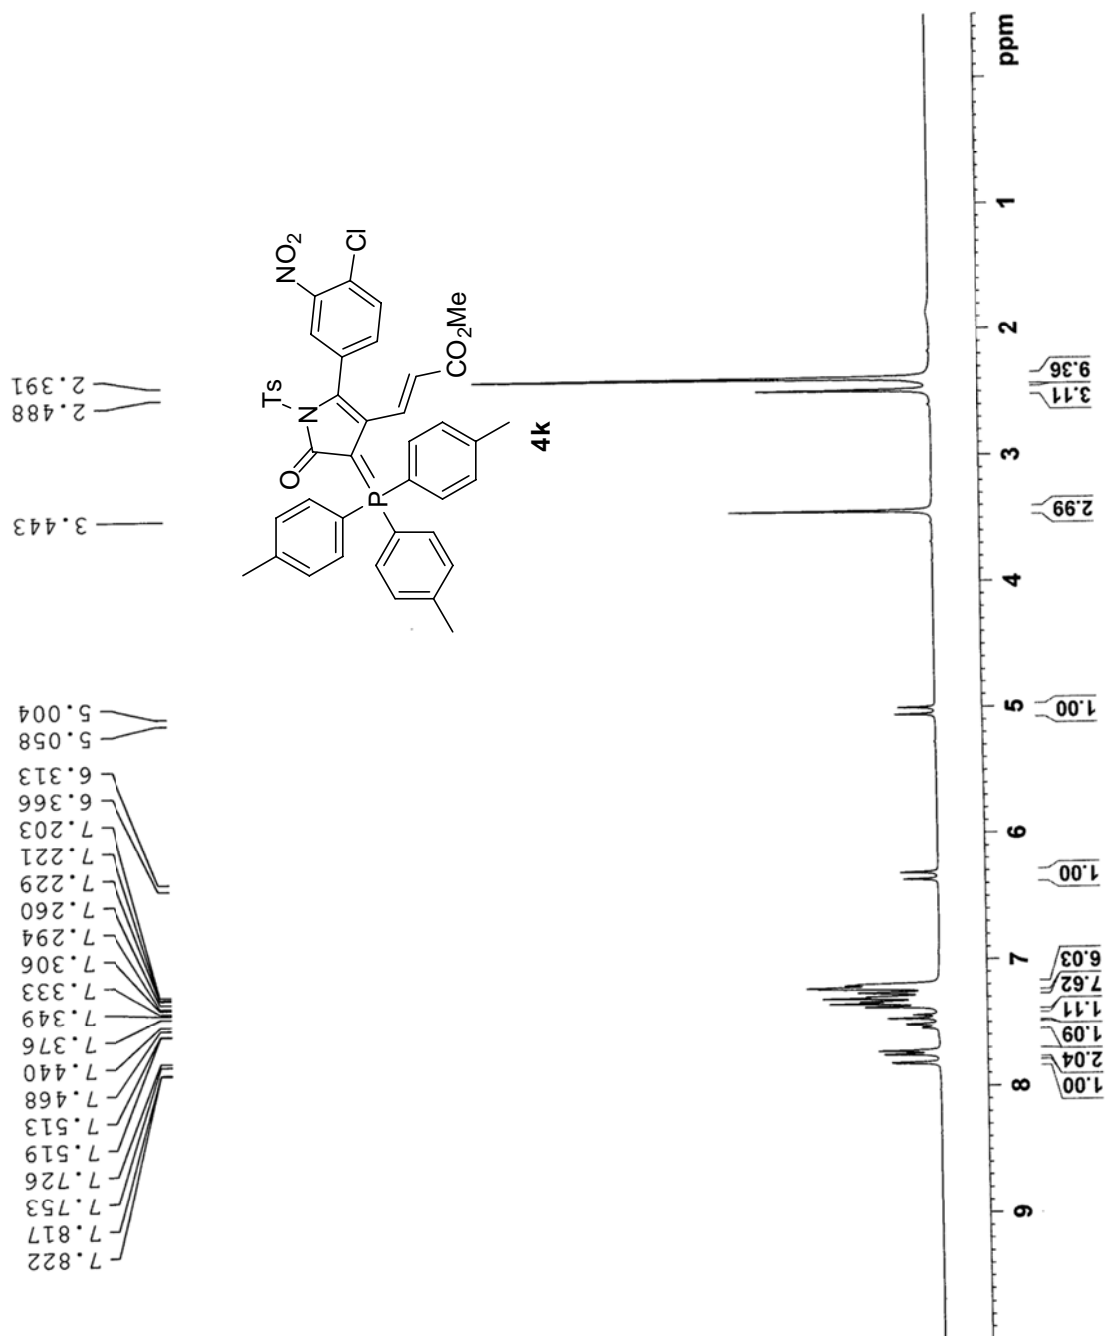

Figure S22.  $^{13}\text{C}$  NMR spectrum of compound **4k** (100 MHz,  
 $\text{CDCl}_3$ )

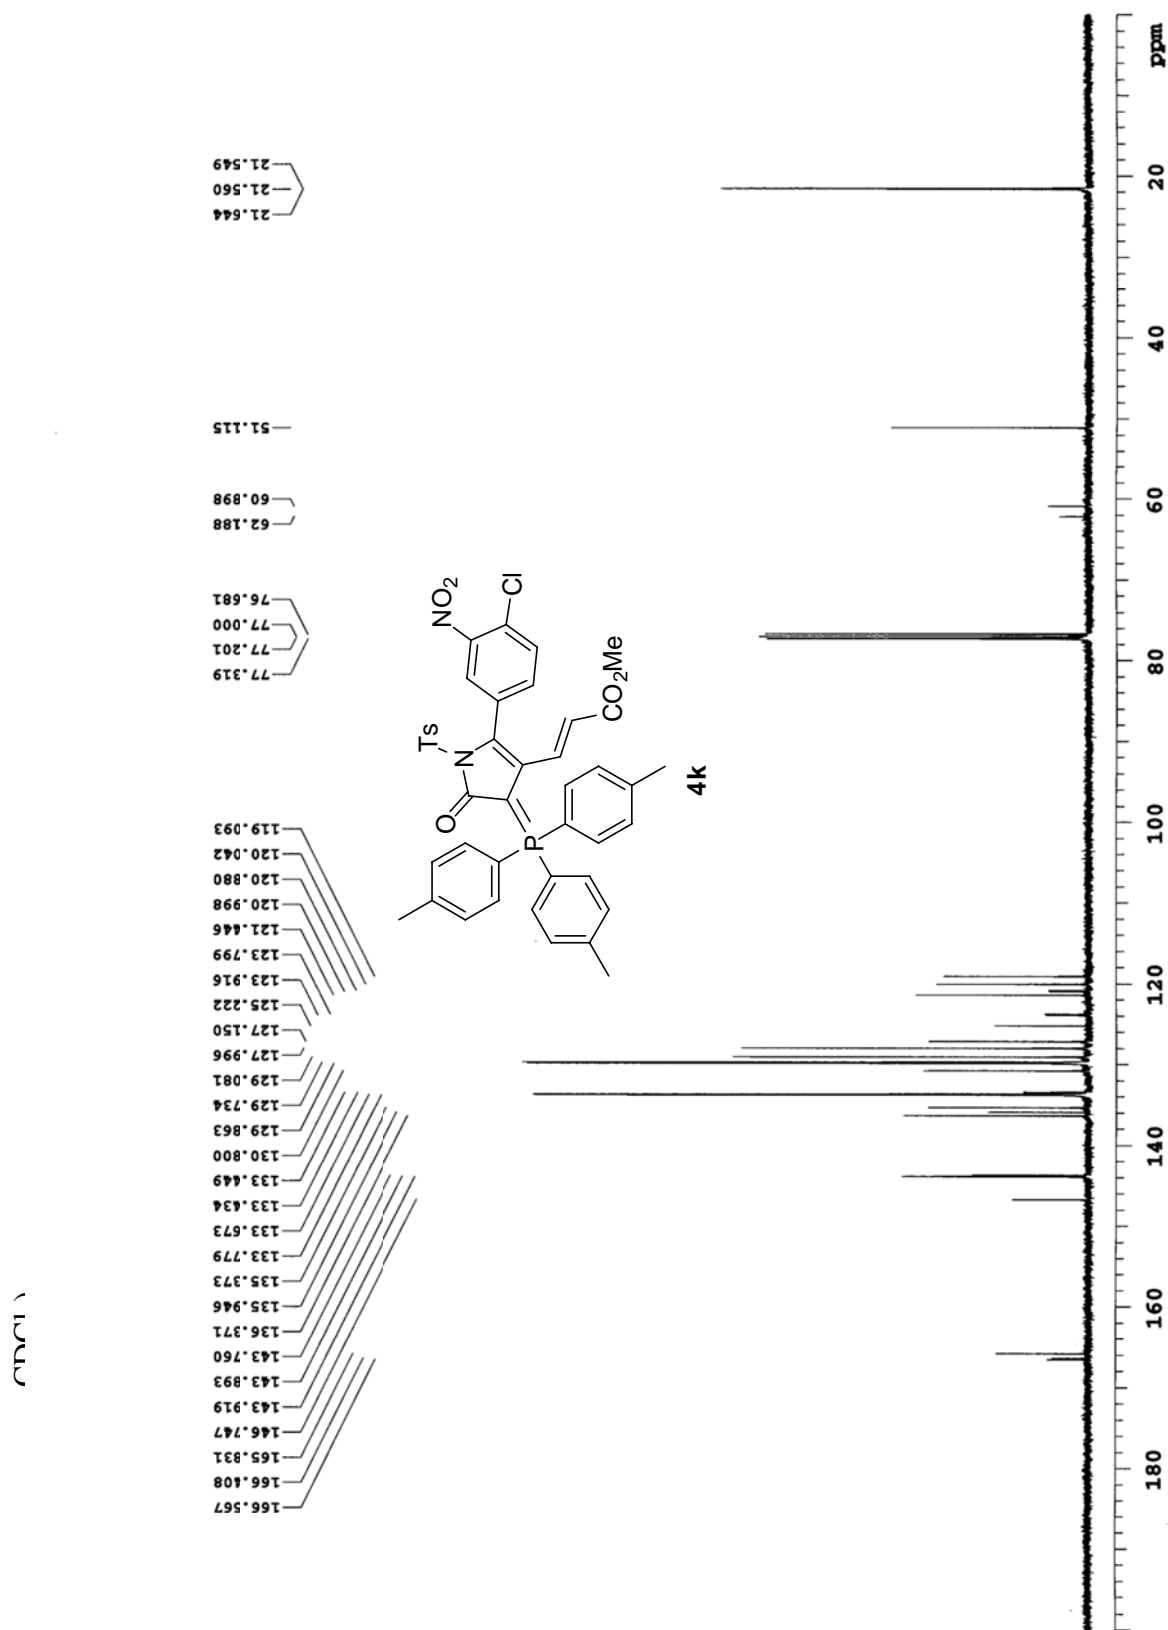

Figure S23.  $^1\text{H}$  NMR spectrum of compound **4I** (300 MHz,  $\text{CDCl}_3$ )

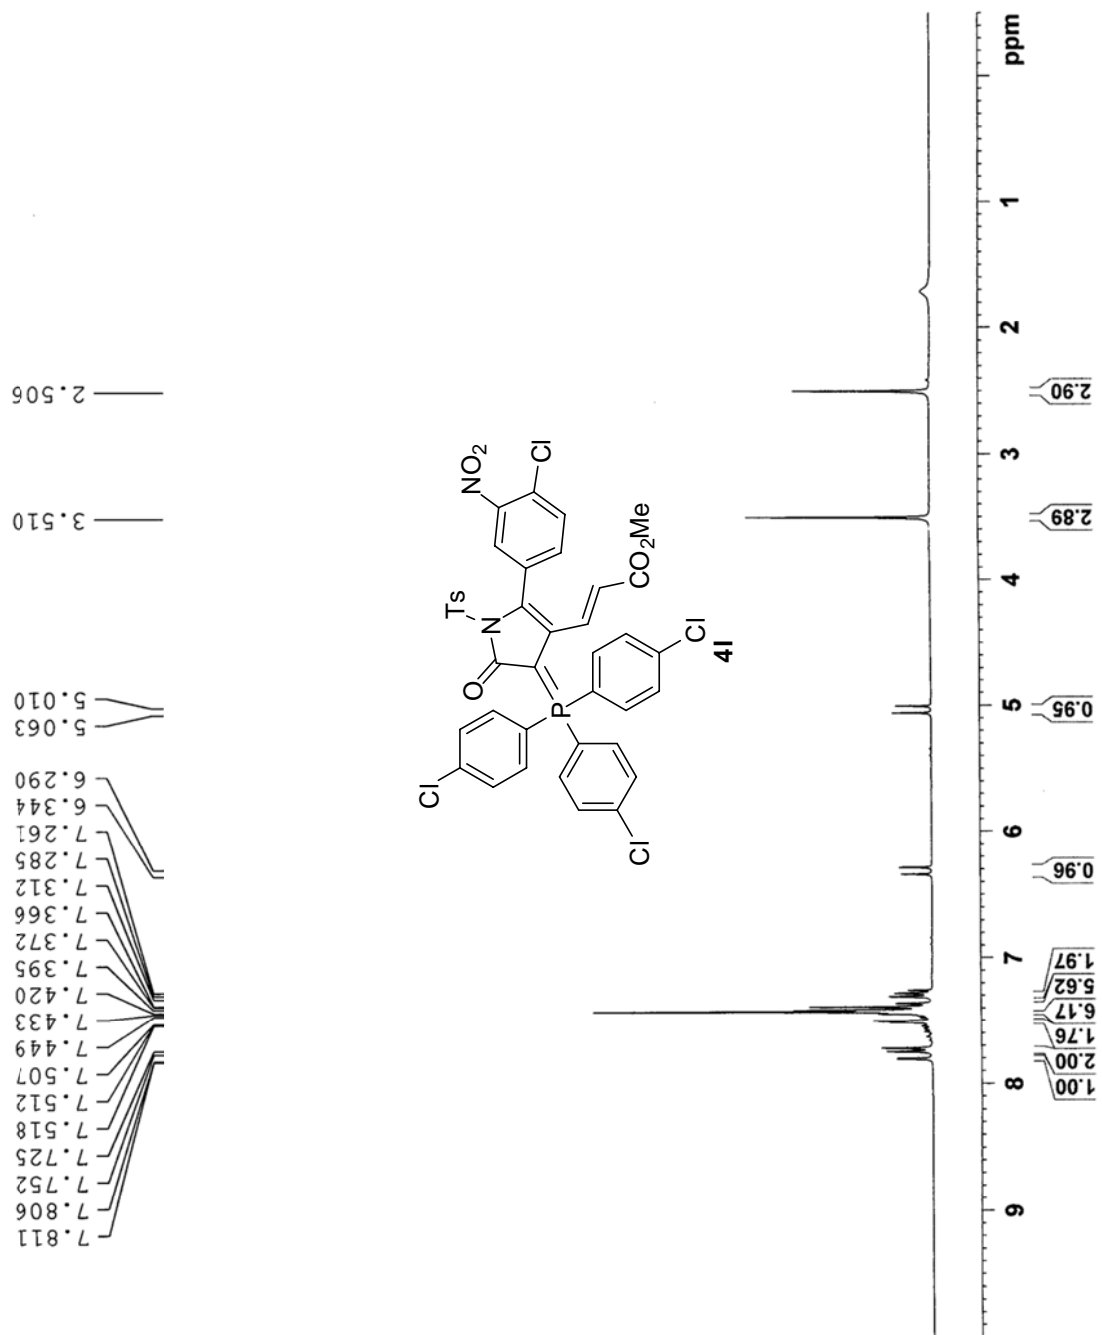



**Figure S24.**  $^{13}\text{C}$  NMR spectrum of compound **4I** (100 MHz,  $\text{CDCl}_3$ )

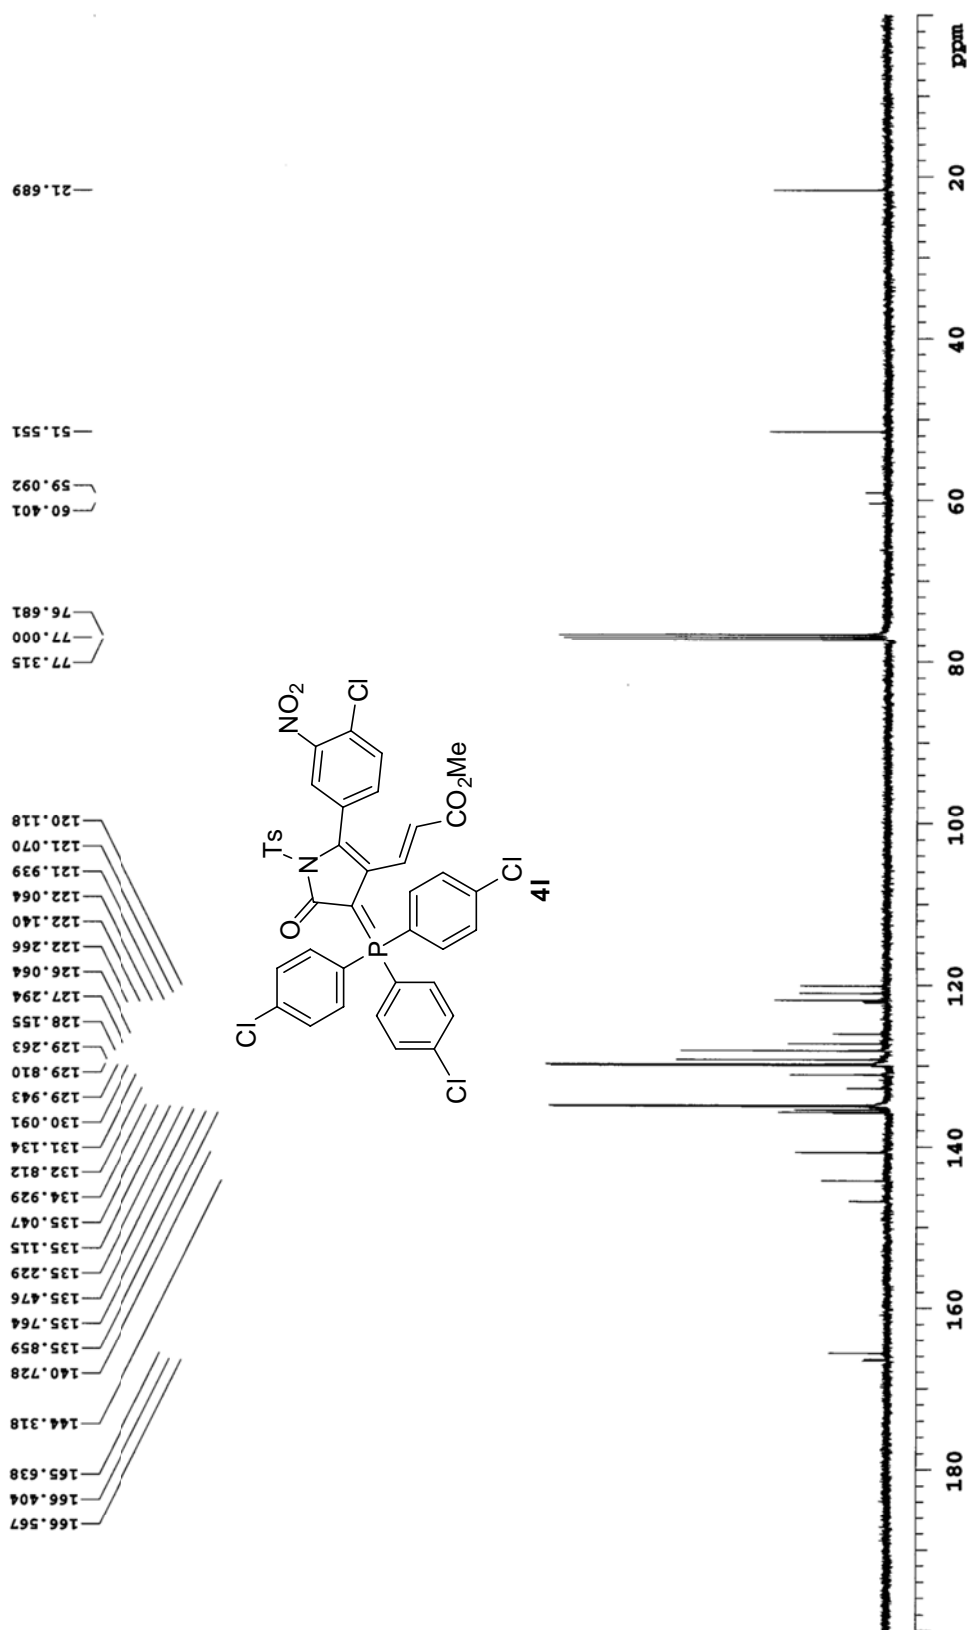

Figure S25.  $^1\text{H}$  NMR spectrum of compound **4m** (300 MHz,  $\text{CDCl}_3$ )

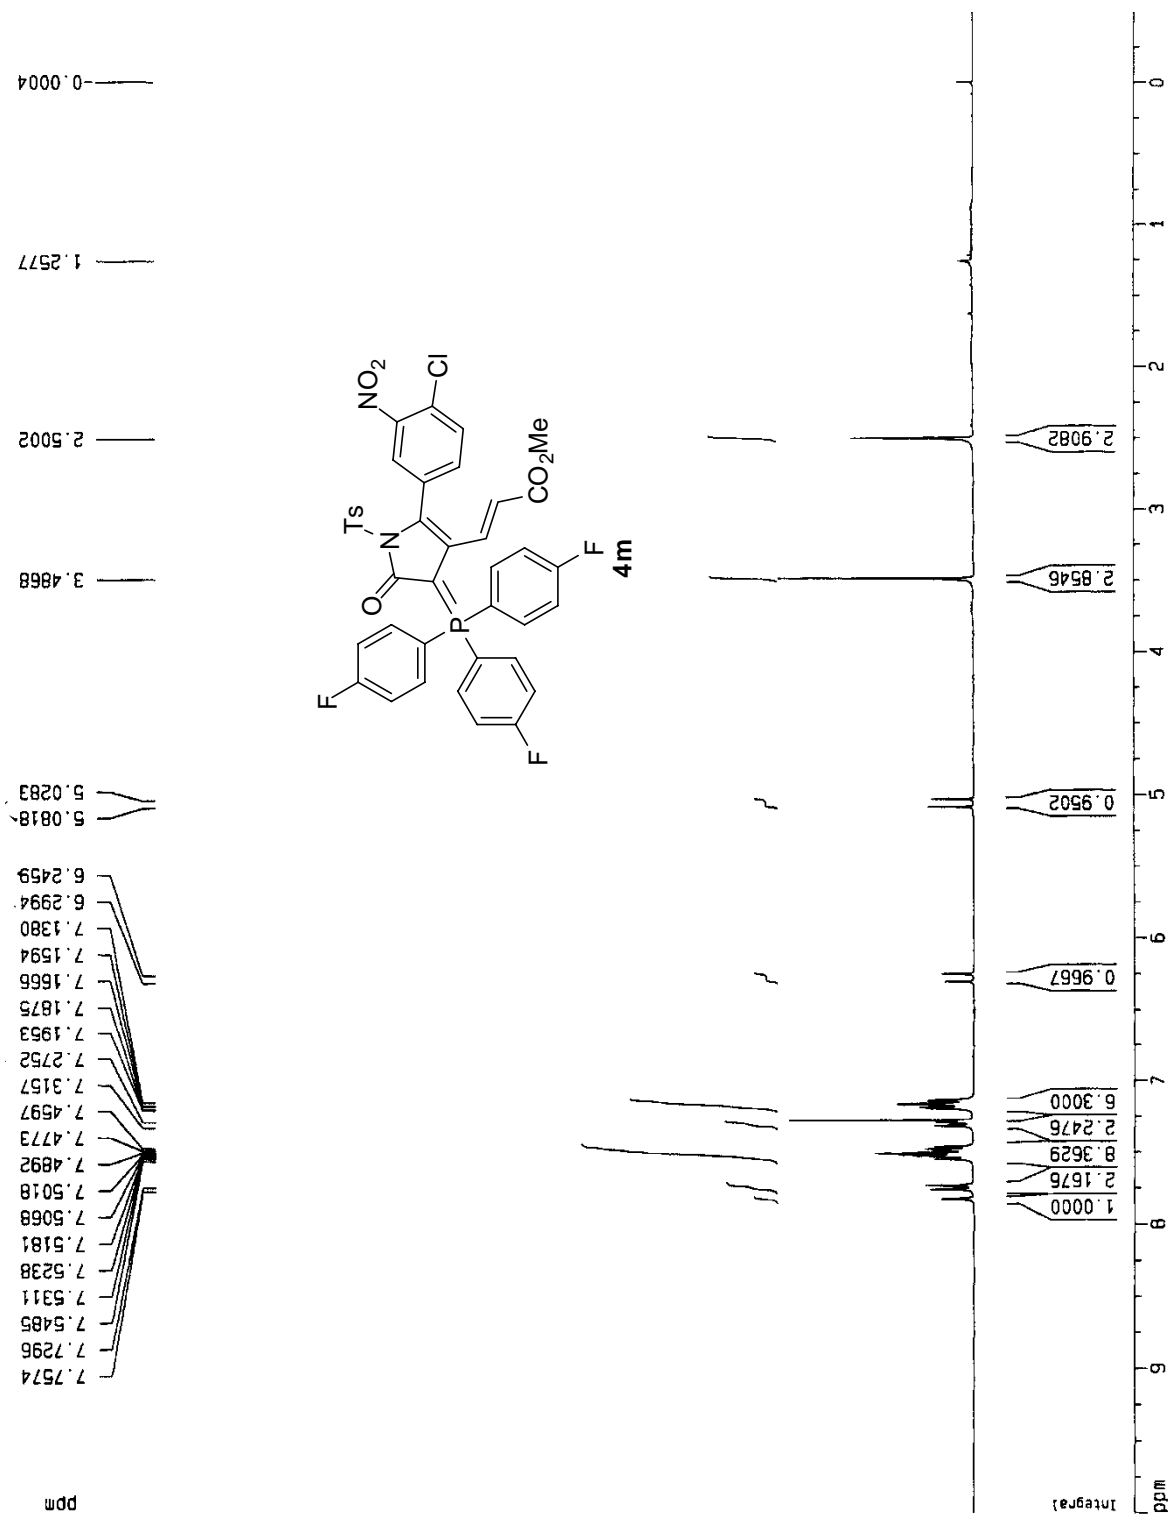

Figure S26.  $^{13}\text{C}$  NMR spectrum of compound **4m** (75 MHz,  $\text{CDCl}_3$ )

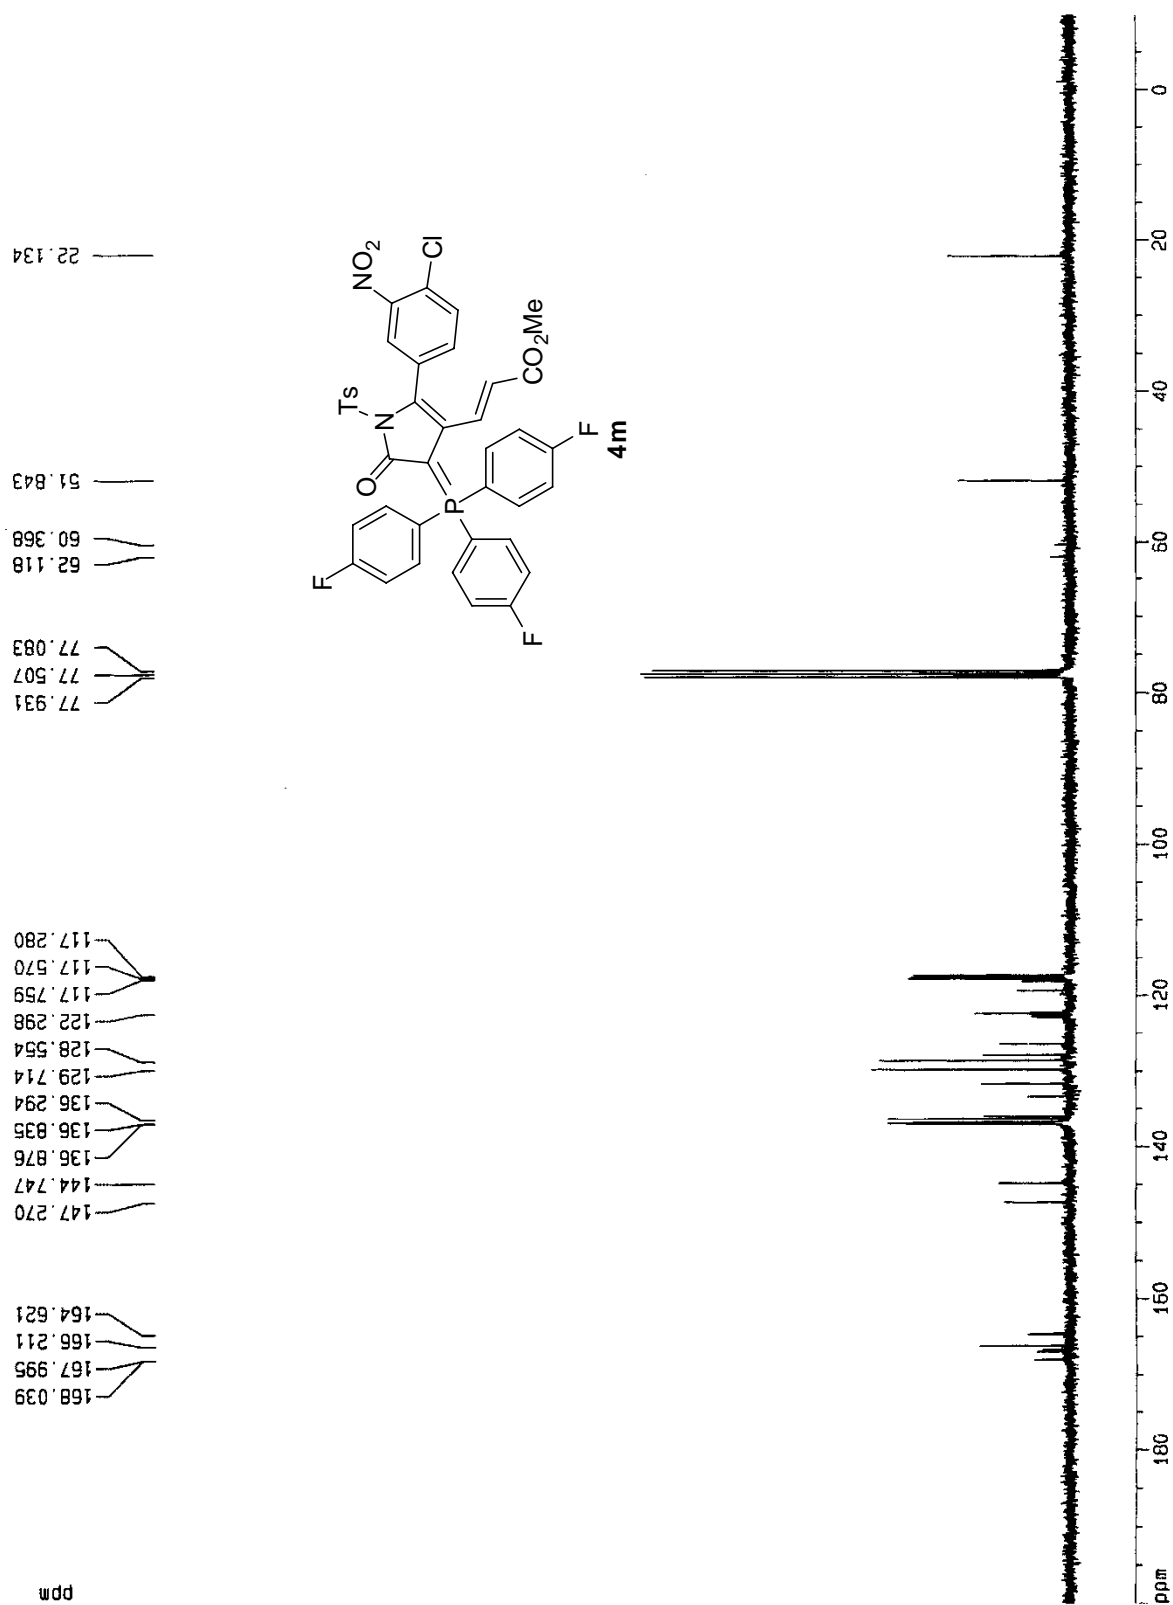

Figure S27.  $^1\text{H}$  NMR spectrum of compound **4n** (300 MHz,  $\text{CDCl}_3$ )

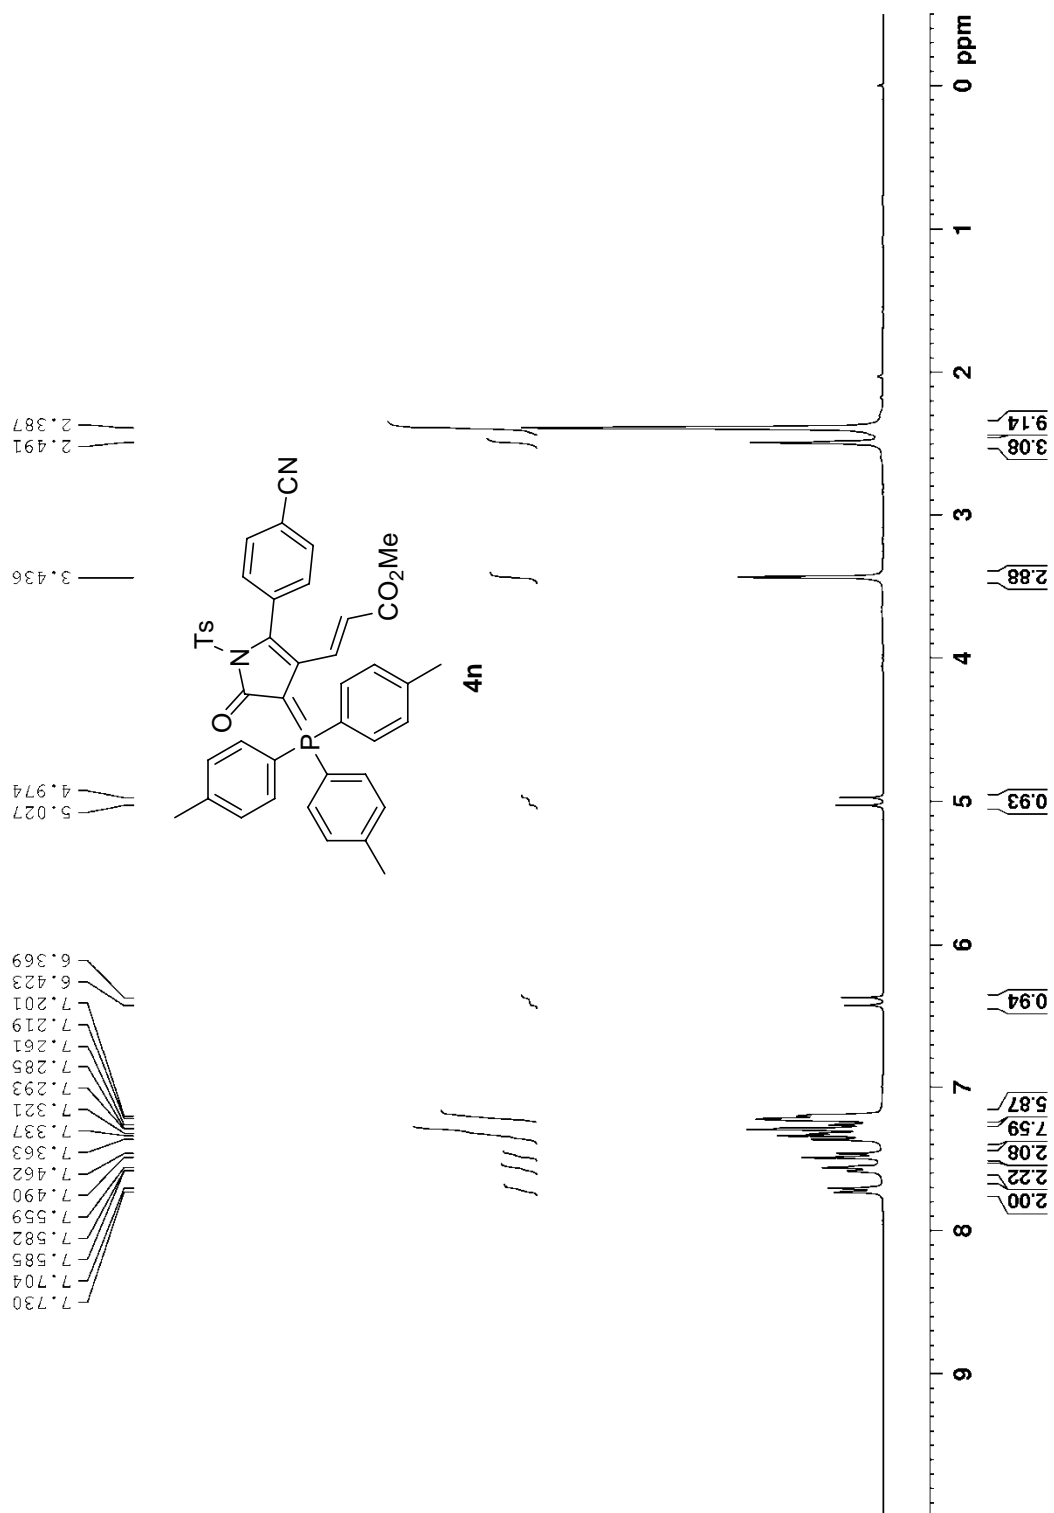

**Figure S28.**  $^{13}\text{C}$  NMR spectrum of compound **4n** (75 MHz,  $\text{CDCl}_3$ )

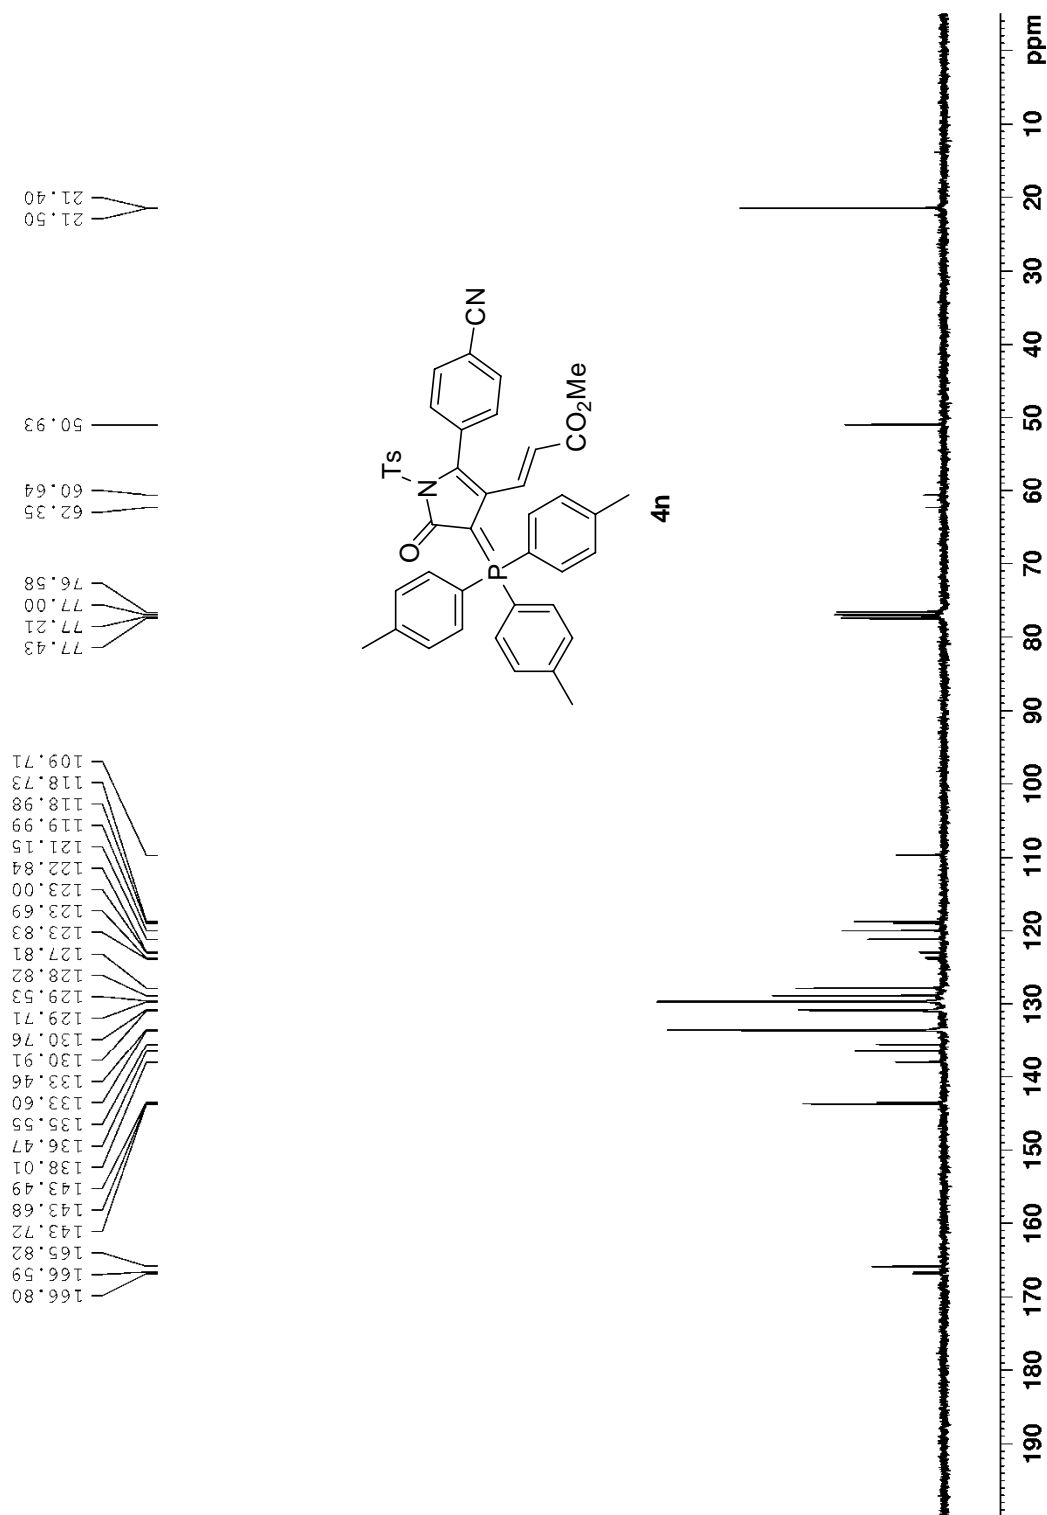

Figure S29. <sup>1</sup>H NMR spectrum of compound **4o** (300 MHz, CDCl<sub>3</sub>)

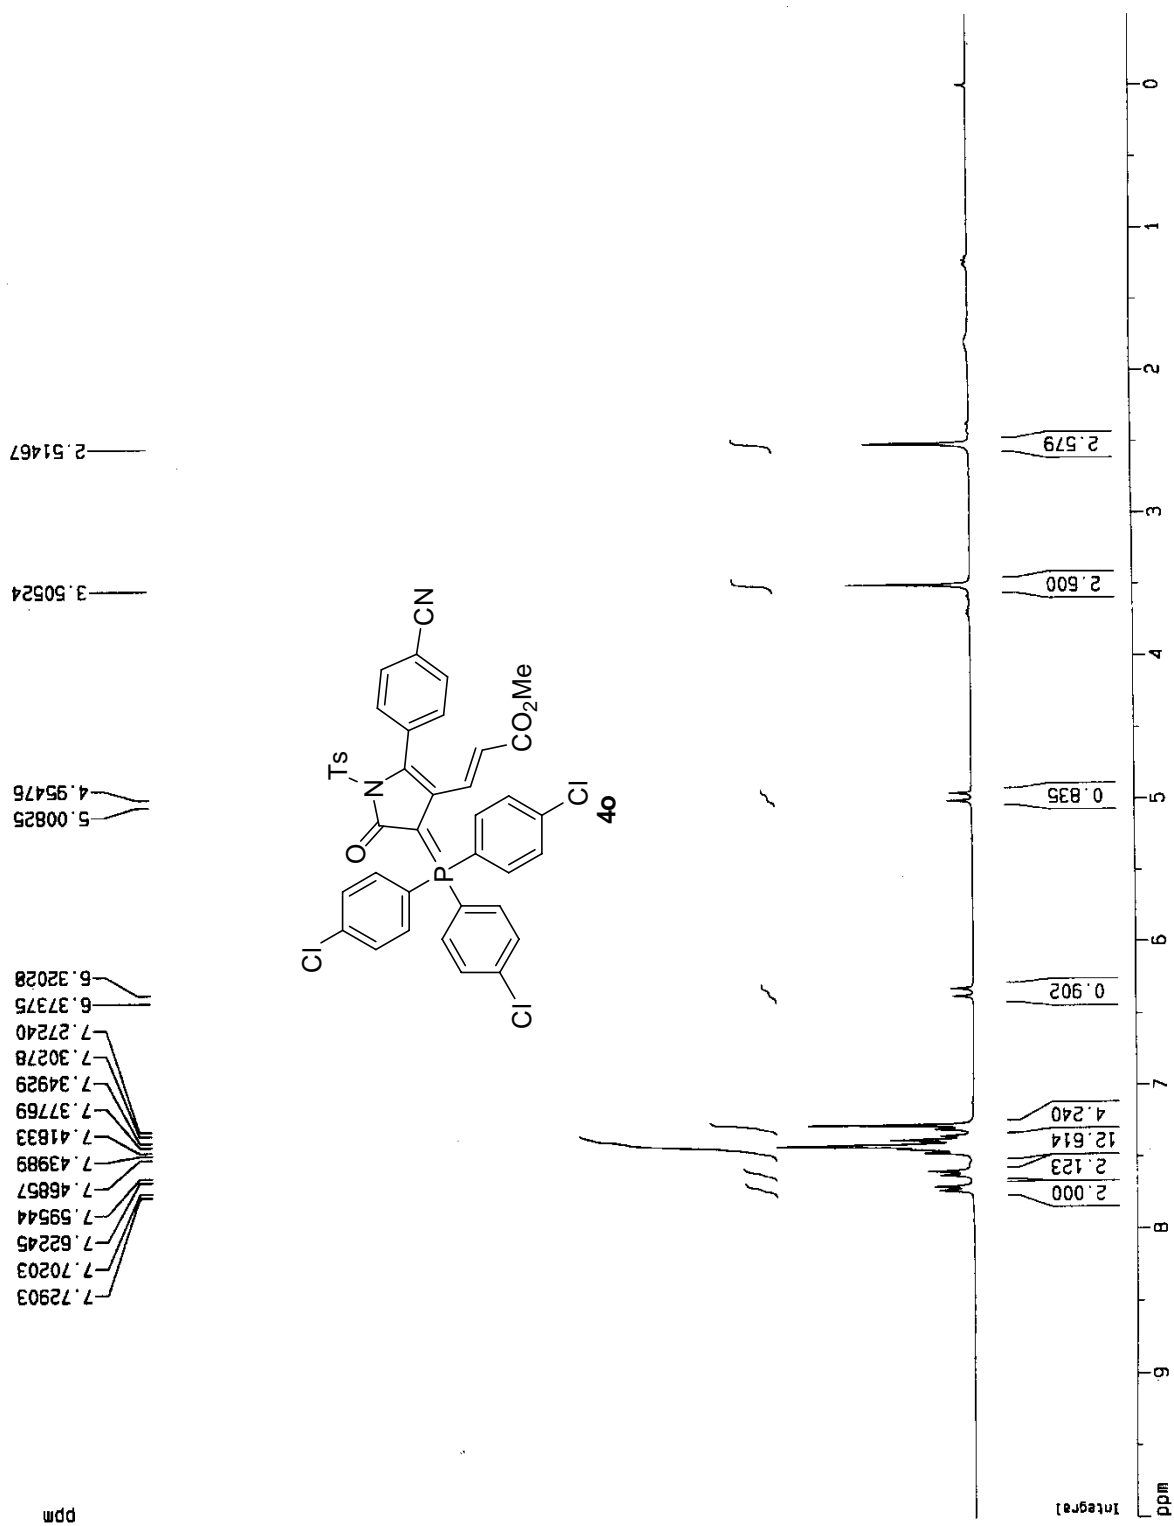

Figure S30.  $^{13}\text{C}$  NMR spectrum of compound **40** (75 MHz,  $\text{CDCl}_3$ )

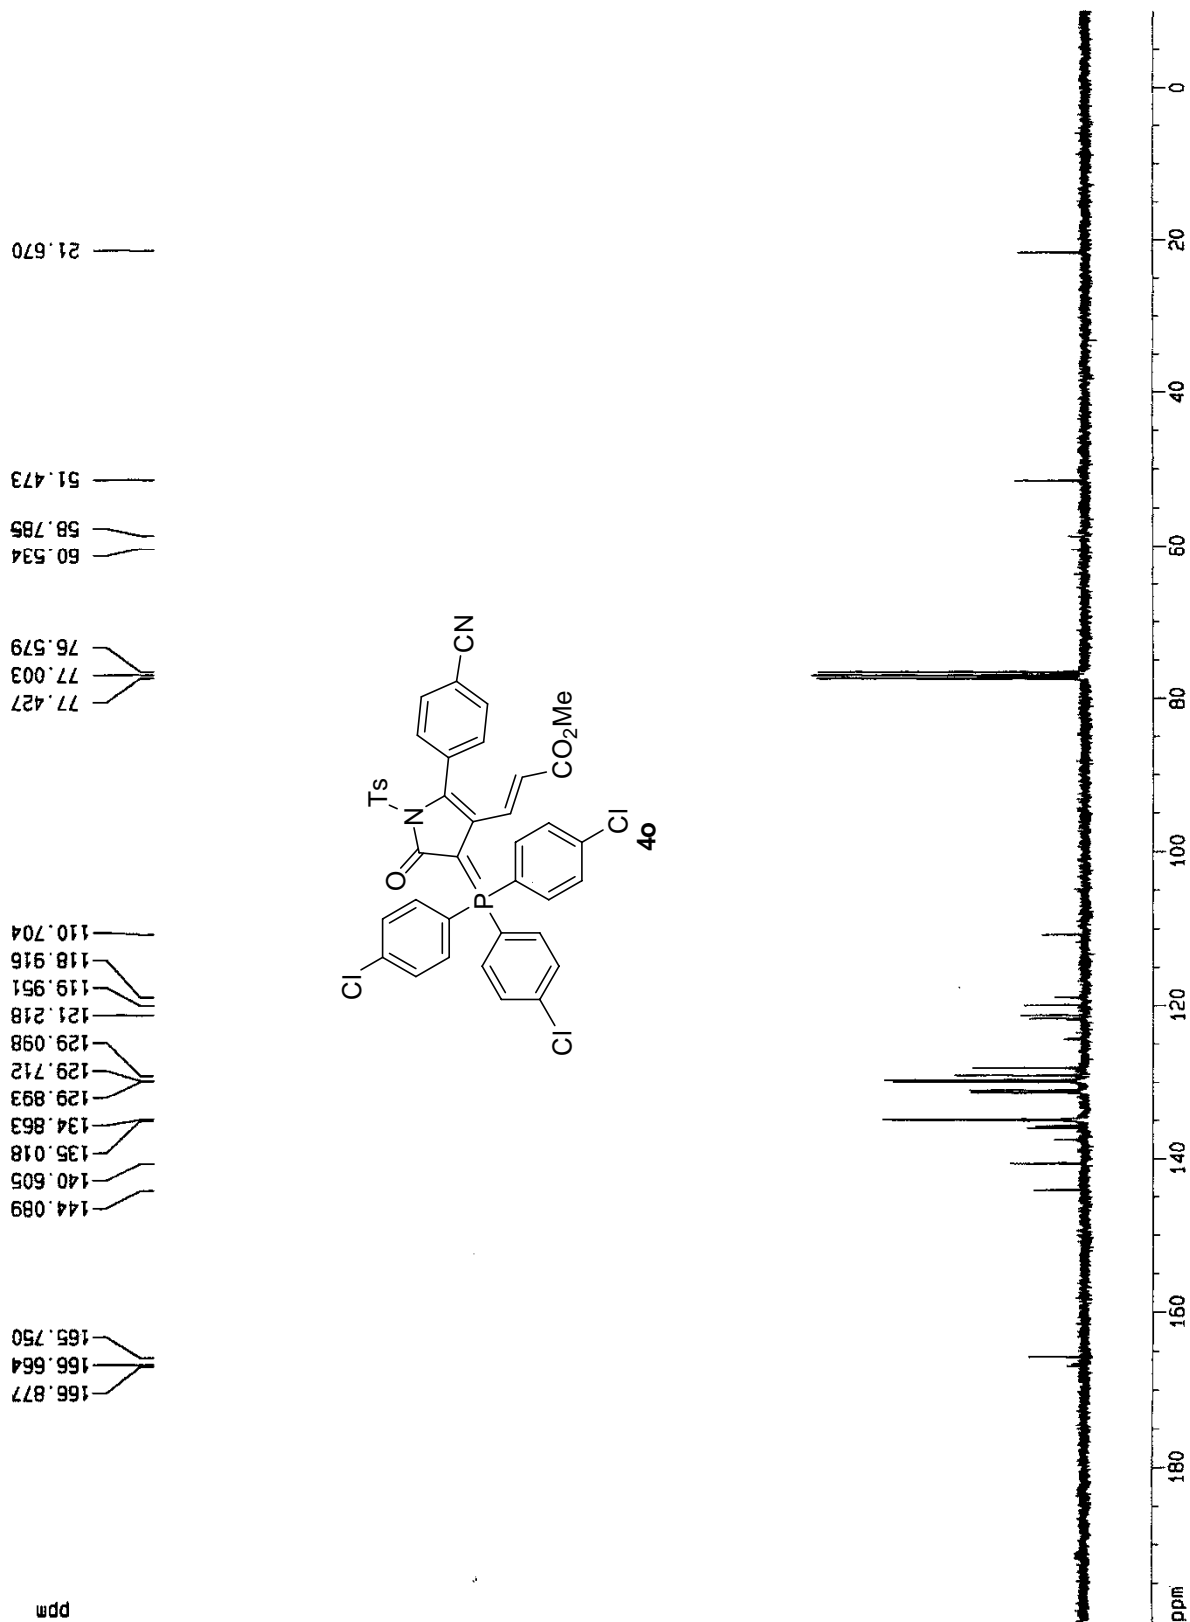

Figure S31. <sup>1</sup>H NMR spectrum of compound **4p** (300 MHz, CDCl<sub>3</sub>)

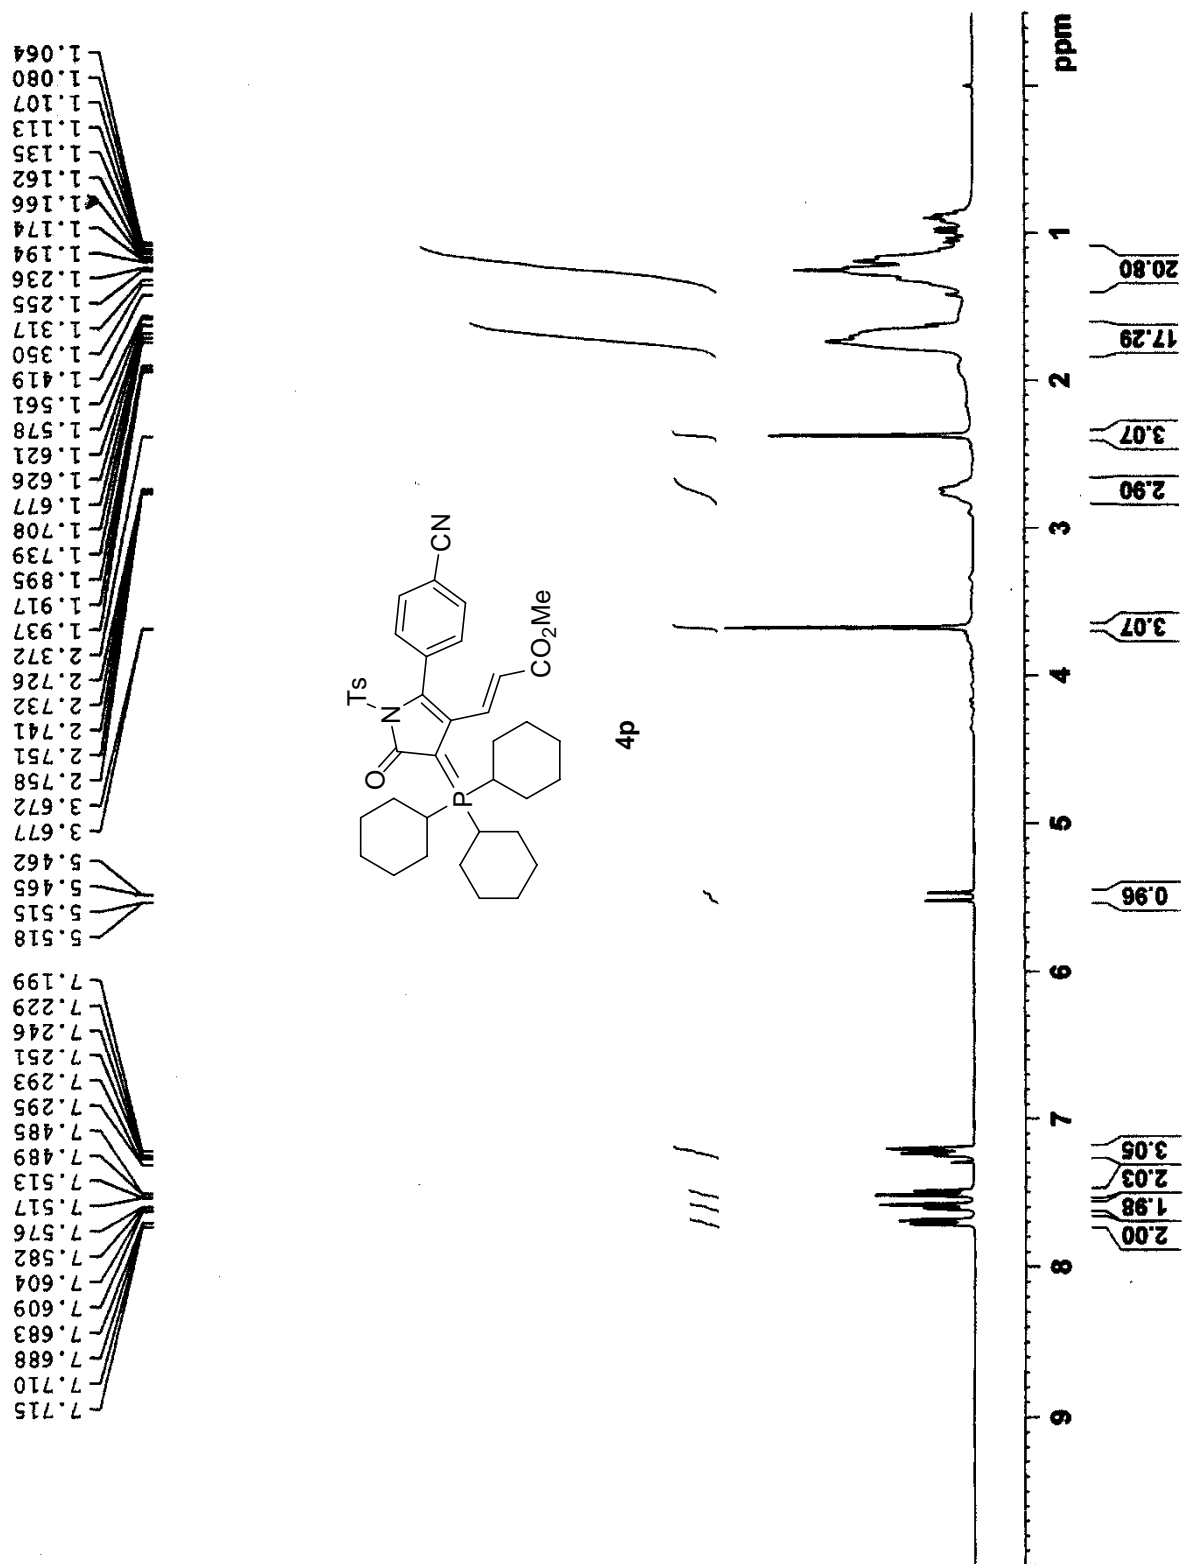



Figure S32.  $^{13}\text{C}$  NMR spectrum of compound **4p** (75 MHz,  $\text{CDCl}_3$ )

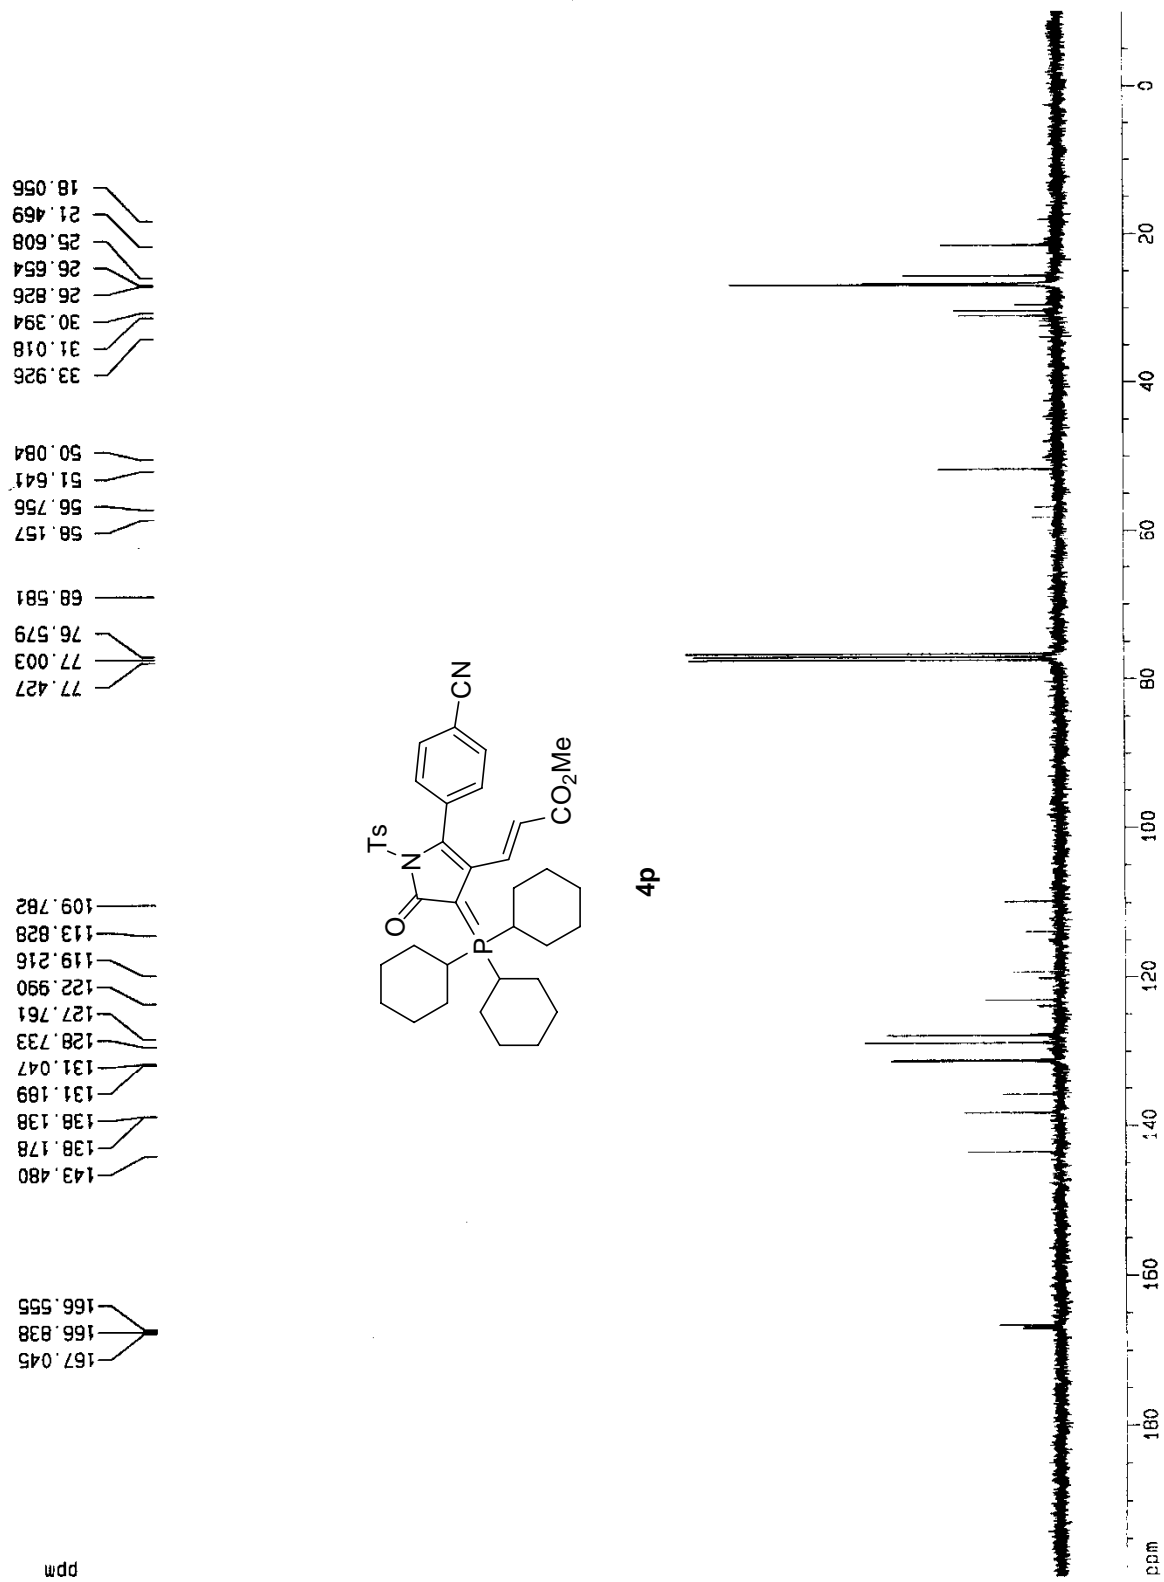

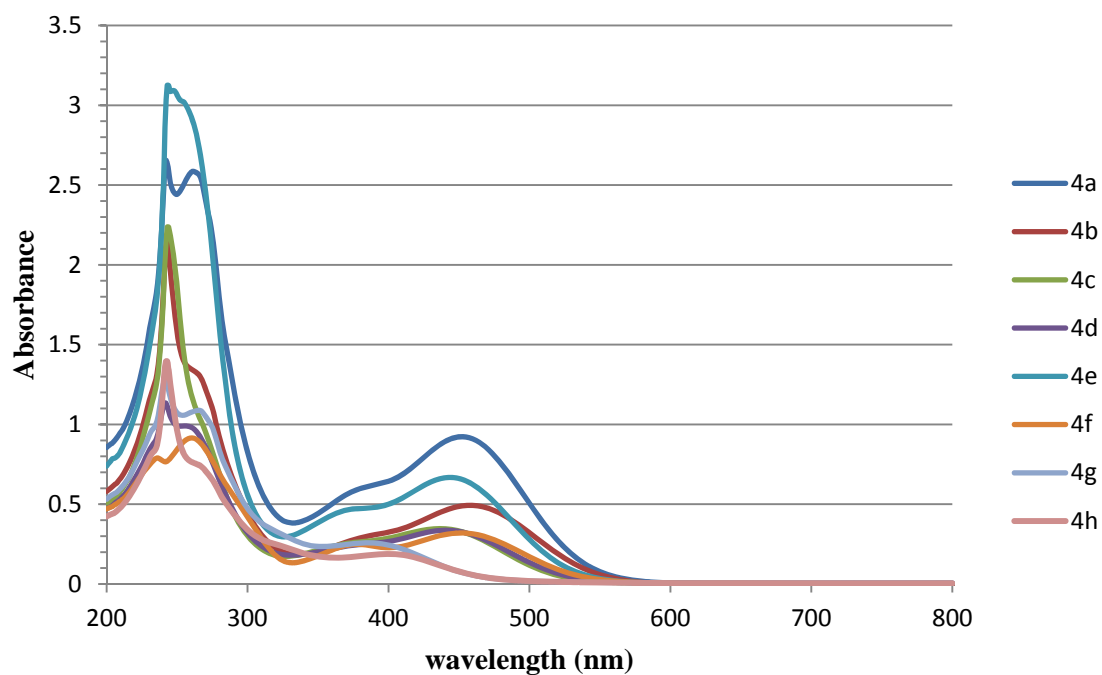

**Figure S33.** UV-vis absorption spectrum of **4a-4h** ( $5.0 \times 10^{-5}$  M in  $\text{CHCl}_3$ ; light path = 10 mm).

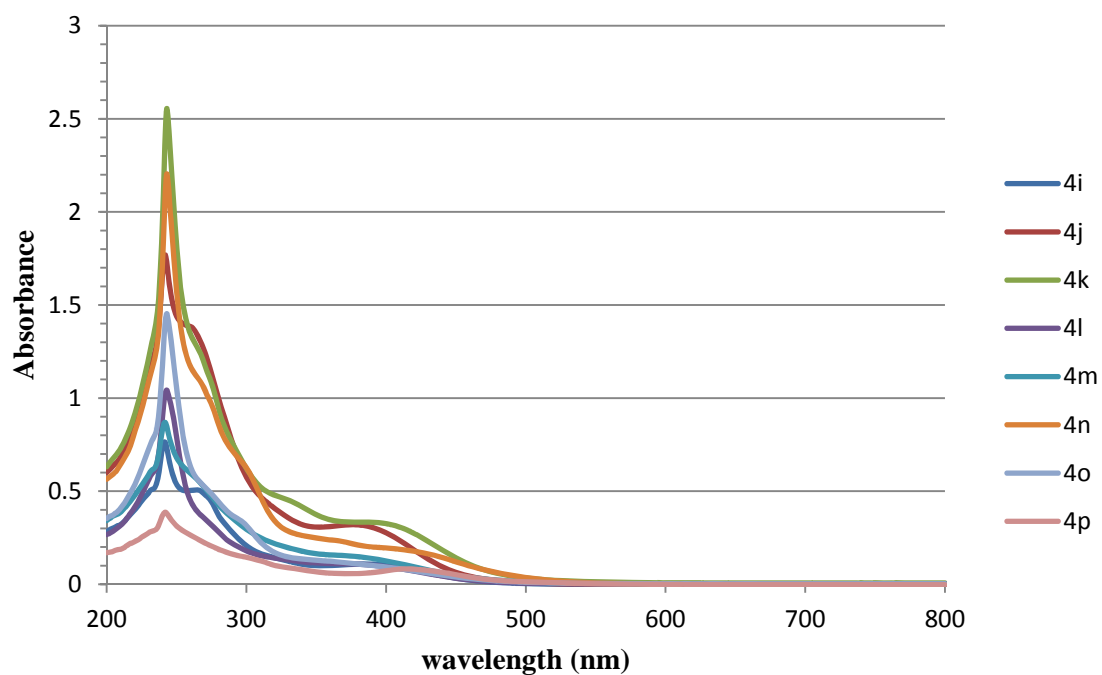

**Figure S34.** UV-vis absorption spectrum of **4i-4p** ( $5.0 \times 10^{-5}$  M in  $\text{CHCl}_3$ ; light path = 10 mm).

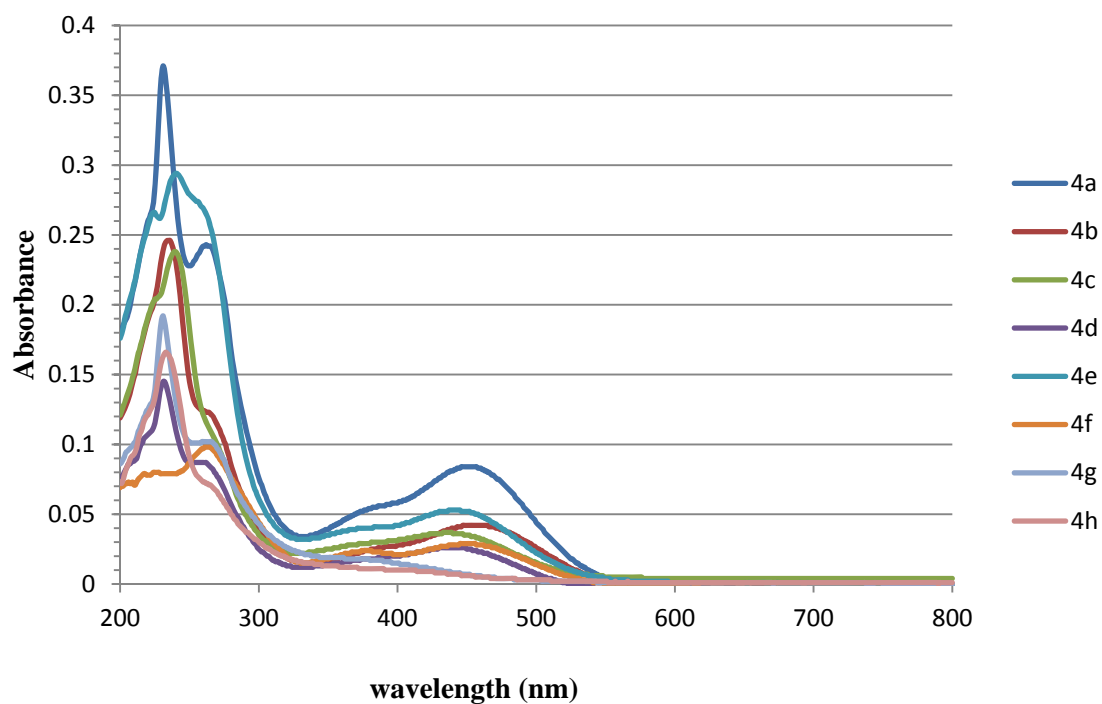

**Figure S35.** UV-vis absorption spectrum of **4a-4h** ( $5.0 \times 10^{-5}$  M in  $\text{CHCl}_3$ ; light path = 1 mm).

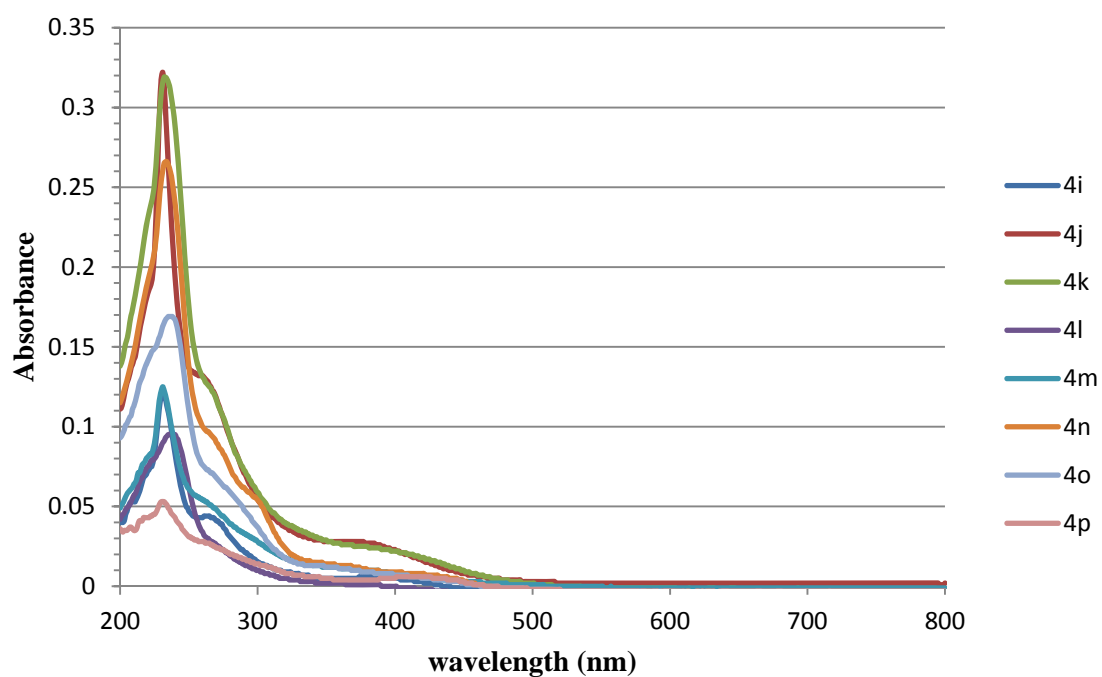

**Figure S36.** UV-vis absorption spectrum of **4i-4p** ( $5.0 \times 10^{-5}$  M in  $\text{CHCl}_3$ ; light path = 1 mm)
